# Supplementary material
Source: publisher site journal article supplement (https://www.spandidos-publications.com/7219/downloadSupplementary)
Supplement: Supplementary file 1 [file downloadSupplementary]

## Sheet: Sheet1
Table SII. Differentially expressed genes.
id	baseMean	baseMean_MCF7_TR_C	baseMean_MCF7_TR_P	foldChange (MCF7_TR_P/MCF7_TR_C)	log2FoldChange	P-value
ENSG00000120738	501.197	77.197	925.197	11.9849	3.58314	4.32155e-99
ENSG00000133048	81.6789	0	163.358	Inf	Inf	4.02735e-79
ENSG00000136167	45.6453	0	91.2907	Inf	Inf	2.42543e-49
ENSG00000142871	1523.28	691.145	2355.41	3.40799	1.76892	4.27281e-40
ENSG00000118523	305.112	114.256	495.968	4.34085	2.11798	6.24245e-39
ENSG00000165092	243.159	86.5001	399.818	4.62217	2.20857	2.64306e-38
ENSG00000134057	10471.6	5143.49	15799.7	3.07178	1.61908	3.49026e-37
ENSG00000244405	232.236	87.7189	376.753	4.295	2.10266	1.13173e-34
ENSG00000120875	373.369	158.797	587.941	3.70248	1.88849	2.53165e-34
ENSG00000138772	453.315	202.027	704.603	3.48766	1.80226	3.60246e-33
ENSG00000145220	921.115	436.867	1405.36	3.21691	1.68568	1.23333e-32
ENSG00000128944	3152.06	1626.47	4677.65	2.87596	1.52404	4.50373e-32
ENSG00000090382	29.2014	0.26718	58.1357	217.59	7.76547	1.00709e-31
ENSG00000087586	6446.73	3423.95	9469.5	2.76566	1.46762	7.35307e-31
ENSG00000166851	3034.61	1707.77	4361.46	2.5539	1.3527	7.97349e-26
ENSG00000072571	2650.65	1491.85	3809.45	2.55352	1.35249	1.38467e-25
ENSG00000172232	32.6416	3.34303	61.9401	18.5281	4.21165	9.13148e-25
ENSG00000126787	3510.95	2025.19	4996.71	2.46728	1.30292	2.58806e-24
ENSG00000111845	1502.3	862.565	2142.04	2.48334	1.31228	5.81424e-23
ENSG00000196352	5982.36	3541.62	8423.11	2.37832	1.24994	6.19574e-23
ENSG00000109971	40308.4	24058.1	56558.7	2.35092	1.23323	6.34527e-23
ENSG00000143228	1903.56	1111.32	2695.8	2.42576	1.27844	1.37388e-22
ENSG00000121621	1643.82	793.762	2493.87	3.14184	1.65161	1.86629e-22
ENSG00000117650	2570.91	1531.3	3610.51	2.3578	1.23744	8.6082e-22
ENSG00000138180	4457.81	2679.3	6236.31	2.32759	1.21884	8.79766e-22
ENSG00000157456	4464.82	2681.6	6248.03	2.32996	1.22031	1.00384e-21
ENSG00000135451	3894.82	2335.34	5454.3	2.33555	1.22376	1.12976e-21
ENSG00000178105	1093.85	638.039	1549.65	2.42877	1.28023	1.22766e-21
ENSG00000140968	17.6277	0	35.2555	Inf	Inf	2.62421e-21
ENSG00000145632	1268.49	750.699	1786.29	2.3795	1.25066	6.62738e-21
ENSG00000167635	3136.59	1924.24	4348.93	2.26008	1.17637	3.76274e-20
ENSG00000067334	3031.09	1856.82	4205.36	2.26481	1.17939	4.84212e-20
ENSG00000080608	1296.38	780.092	1812.66	2.32365	1.21639	5.96883e-20
ENSG00000105472	17.4625	0.26718	34.6579	129.717	7.01923	1.58748e-19
ENSG00000065548	2484.64	1541.92	3427.36	2.22279	1.15237	4.37901e-19
ENSG00000151632	164.908	81.553	248.263	3.04419	1.60606	7.10596e-19
ENSG00000134058	1085.97	661.194	1510.74	2.28487	1.19211	9.11212e-19
ENSG00000136045	2243.33	1405.93	3080.73	2.19124	1.13175	1.78375e-18
ENSG00000055044	2119.92	1334.83	2905.01	2.17631	1.12188	3.45719e-18
ENSG00000151466	526.631	311.645	741.617	2.37969	1.25077	4.23254e-18
ENSG00000112984	7366.87	4721.61	10012.1	2.12049	1.0844	5.71009e-18
ENSG00000155438	1079.99	647.209	1512.77	2.33737	1.22489	1.16699e-17
ENSG00000110077	14.7224	0	29.4448	Inf	Inf	1.43702e-17
ENSG00000141101	1196.78	751.753	1641.8	2.18397	1.12695	2.08559e-17
ENSG00000166598	12115.2	7846.87	16383.6	2.08791	1.06206	2.78828e-17
ENSG00000186193	748.297	461.984	1034.61	2.23949	1.16317	3.02453e-17
ENSG00000115758	6421.21	4154.29	8688.14	2.09136	1.06444	3.03494e-17
ENSG00000105821	1037.77	590.261	1485.27	2.5163	1.3313	3.05278e-17
ENSG00000133773	1216.28	694.125	1738.43	2.50449	1.32452	5.86463e-17
ENSG00000110104	1115.81	703.653	1527.96	2.17147	1.11867	6.25149e-17
ENSG00000163002	687.123	425.013	949.233	2.23342	1.15926	7.55328e-17
ENSG00000089048	773.627	408.276	1138.98	2.78973	1.48012	1.46314e-16
ENSG00000163811	2860.61	1875.25	3845.97	2.05091	1.03627	4.42121e-16
ENSG00000146674	378.022	227.702	528.343	2.32033	1.21433	9.04007e-16
ENSG00000117399	6888.41	3530.44	10246.4	2.90229	1.53719	1.00496e-15
ENSG00000156256	799.25	510.964	1087.54	2.1284	1.08977	1.57684e-15
ENSG00000123338	13.9634	0.342715	27.5841	80.487	6.33068	1.63859e-15
ENSG00000113460	6206.57	4130.69	8282.46	2.0051	1.00368	1.95393e-15
ENSG00000104412	734.833	467.319	1002.35	2.14489	1.1009	2.05216e-15
ENSG00000135919	253.274	147.007	359.54	2.44573	1.29026	2.31545e-15
ENSG00000114107	1001.54	647.216	1355.85	2.0949	1.06688	2.73673e-15
ENSG00000198915	537.687	337.595	737.779	2.1854	1.1279	3.06114e-15
ENSG00000144895	2686.91	1784.44	3589.38	2.01148	1.00826	4.12518e-15
ENSG00000176014	4688.69	2889.32	6488.06	2.24553	1.16706	4.24211e-15
ENSG00000163510	913.309	591.032	1235.59	2.09056	1.06389	4.44952e-15
ENSG00000175832	209.721	83.5226	335.919	4.02189	2.00788	4.49037e-15
ENSG00000137267	226.755	128.511	324.998	2.52895	1.33854	4.91106e-15
ENSG00000109519	1326.51	871.974	1781.05	2.04255	1.03037	5.03654e-15
ENSG00000115956	14.357	0.342715	28.3713	82.7838	6.37128	8.62549e-15
ENSG00000110852	426.394	246.367	606.422	2.46146	1.29952	1.23959e-14
ENSG00000174720	567.371	360.726	774.016	2.14572	1.10146	1.27684e-14
ENSG00000115163	1259.42	784.125	1734.72	2.2123	1.14554	1.40781e-14
ENSG00000180353	13.9984	0.6023	27.3944	45.483	5.50726	1.58318e-14
ENSG00000162385	1124.44	701.274	1547.61	2.20686	1.14199	1.75161e-14
ENSG00000136244	35.5061	10.6172	60.3951	5.68842	2.50803	1.85785e-14
ENSG00000115946	1161.79	768.812	1554.78	2.02231	1.016	2.34141e-14
ENSG00000172927	141.928	65.4462	218.411	3.33726	1.73866	4.38917e-14
ENSG00000152422	416.012	263.571	568.452	2.15673	1.10884	8.5827e-14
ENSG00000170345	786.026	519.395	1052.66	2.0267	1.01913	8.75302e-14
ENSG00000147654	703.035	461.935	944.134	2.04387	1.0313	9.66921e-14
ENSG00000113739	279.389	170.915	387.864	2.26934	1.18227	1.21748e-13
ENSG00000176907	79.4284	36.5163	122.341	3.35029	1.74429	1.45436e-13
ENSG00000197498	738.276	478.926	997.626	2.08305	1.0587	1.98691e-13
ENSG00000049089	77.5856	36.7562	118.415	3.22164	1.6878	2.88357e-13
ENSG00000024526	2888.87	1859.74	3917.99	2.10674	1.07501	4.38148e-13
ENSG00000160124	670.97	445.76	896.181	2.01046	1.00752	4.67407e-13
ENSG00000198369	476.146	311.621	640.67	2.05593	1.03979	5.10168e-13
ENSG00000058729	677.918	451.082	904.753	2.00574	1.00414	6.80984e-13
ENSG00000111348	53.684	22.8263	84.5417	3.7037	1.88897	7.69015e-13
ENSG00000131737	32.0441	10.098	53.9901	5.3466	2.41862	9.45787e-13
ENSG00000137692	2130.64	1362.64	2898.64	2.12723	1.08898	1.11167e-12
ENSG00000119917	312.54	199.119	425.961	2.13923	1.09709	1.32605e-12
ENSG00000198848	15.4067	1.93919	28.8742	14.8898	3.89625	2.20279e-12
ENSG00000137965	248.613	156.341	340.886	2.1804	1.12459	6.38076e-12
ENSG00000138166	162.307	96.1971	228.416	2.37446	1.2476	6.56703e-12
ENSG00000196793	306.161	199.426	412.896	2.07042	1.04993	1.16261e-11
ENSG00000117133	1287.03	846.789	1727.27	2.03978	1.02842	1.20626e-11
ENSG00000134533	182.041	111.273	252.809	2.27197	1.18394	1.41365e-11
ENSG00000163535	902.507	510.357	1294.66	2.53677	1.34299	1.49508e-11
ENSG00000089685	6138.02	3994.13	8281.91	2.07352	1.05208	2.00889e-11
ENSG00000143851	11.9308	0.86948	22.9922	26.4436	4.72485	2.34523e-11
ENSG00000224578	320.424	212.137	428.712	2.02092	1.01501	4.17252e-11
ENSG00000096872	255.041	165.45	344.633	2.083	1.05867	5.04125e-11
ENSG00000135114	780.009	504.344	1055.67	2.09316	1.06568	5.24204e-11
ENSG00000169385	8.60073	0	17.2015	Inf	Inf	6.01592e-11
ENSG00000129460	828.104	506.577	1149.63	2.26941	1.18232	1.15647e-10
ENSG00000125810	8.25771	0	16.5154	Inf	Inf	1.59718e-10
ENSG00000161179	296.966	192.285	401.646	2.0888	1.06268	1.88544e-10
ENSG00000142910	261.619	173.629	349.608	2.01353	1.00973	1.94094e-10
ENSG00000175592	333.295	131.073	535.517	4.08563	2.03056	4.77974e-10
ENSG00000188229	13621.4	8434.49	18808.2	2.22992	1.15699	8.01566e-10
ENSG00000137331	112.441	67.2785	157.604	2.34256	1.22809	8.1768e-10
ENSG00000167613	11.2655	0	22.5309	Inf	Inf	9.21419e-10
ENSG00000171617	52.4158	25.6356	79.1961	3.08931	1.62728	1.0713e-09
ENSG00000139318	51.0588	24.7539	77.3636	3.12531	1.644	1.51651e-09
ENSG00000143119	12.5365	1.93919	23.1338	11.9296	3.57648	1.53123e-09
ENSG00000123975	5304.03	2472.61	8135.45	3.29023	1.71819	1.85609e-09
ENSG00000087302	3224.86	2139.44	4310.29	2.01468	1.01055	2.57276e-09
ENSG00000121807	7.13344	0	14.2669	Inf	Inf	3.23182e-09
ENSG00000100526	1686.94	1017.9	2355.98	2.31455	1.21073	4.48587e-09
ENSG00000185022	133.397	84.6786	182.116	2.15067	1.10479	5.17023e-09
ENSG00000204482	6.95599	0	13.912	Inf	Inf	5.31337e-09
ENSG00000169429	25.7075	9.44557	41.9694	4.44329	2.15163	5.45563e-09
ENSG00000140280	220.899	136.416	305.383	2.23862	1.16261	9.74376e-09
ENSG00000154127	156.5	103.758	209.243	2.01664	1.01195	1.01427e-08
ENSG00000139289	173.225	114.567	231.883	2.024	1.01721	1.06602e-08
ENSG00000154217	882.887	549.671	1216.1	2.21242	1.14562	1.26883e-08
ENSG00000170571	22.1915	7.91703	36.466	4.60601	2.20352	2.63307e-08
ENSG00000123545	546.125	311.718	780.533	2.50397	1.32422	2.79344e-08
ENSG00000215784	127.51	83.0222	171.998	2.07171	1.05082	4.38112e-08
ENSG00000116691	417.163	275.236	559.09	2.03131	1.02241	5.2935e-08
ENSG00000048740	5.99731	0	11.9946	Inf	Inf	6.76191e-08
ENSG00000006327	996.978	617.915	1376.04	2.22691	1.15504	7.62801e-08
ENSG00000225921	1981.46	1255.54	2707.38	2.15634	1.10859	7.87088e-08
ENSG00000164611	6105.4	3428.08	8782.72	2.562	1.35727	8.24668e-08
ENSG00000117395	2663.21	1746.02	3580.41	2.05061	1.03605	9.53007e-08
ENSG00000110934	5.87306	0	11.7461	Inf	Inf	1.07764e-07
ENSG00000117114	5.83605	0	11.6721	Inf	Inf	1.10441e-07
ENSG00000067048	7.75449	0.30115	15.2078	50.4992	5.65819	1.1358e-07
ENSG00000118785	7.56044	0.53436	14.5865	27.2972	4.77068	1.41478e-07
ENSG00000263513	69.2428	41.5238	96.9619	2.33509	1.22348	1.74164e-07
ENSG00000149516	5.60973	0	11.2195	Inf	Inf	1.88534e-07
ENSG00000126249	92.4739	56.4169	128.531	2.27823	1.18792	1.98403e-07
ENSG00000144182	92.7581	58.964	126.552	2.14627	1.10183	2.01892e-07
ENSG00000073737	9.4361	1.48697	17.3852	11.6917	3.54741	2.42697e-07
ENSG00000108106	3811.71	1848.11	5775.31	3.12499	1.64385	2.4628e-07
ENSG00000166166	373.09	247	499.18	2.02097	1.01505	2.50939e-07
ENSG00000127824	4051.56	2685.91	5417.21	2.0169	1.01214	2.52279e-07
ENSG00000101132	1228.32	818.807	1637.83	2.00026	1.00019	3.02757e-07
ENSG00000135363	7.18744	0.6023	13.7726	22.8666	4.51517	3.54032e-07
ENSG00000165887	77.6971	48.6535	106.741	2.1939	1.1335	3.76784e-07
ENSG00000196923	974.023	642.766	1305.28	2.03073	1.02199	3.84938e-07
ENSG00000133101	98.2125	63.9117	132.513	2.07338	1.05199	5.55817e-07
ENSG00000158517	6.11904	0.26718	11.9709	44.8046	5.48558	6.62525e-07
ENSG00000165731	9.66791	1.78812	17.5477	9.81349	3.29477	6.83135e-07
ENSG00000184185	79.0786	50.8958	107.261	2.10747	1.07551	7.12453e-07
ENSG00000185811	5.10079	0	10.2016	Inf	Inf	8.40523e-07
ENSG00000175920	67.6524	41.9638	93.341	2.22432	1.15336	9.5557e-07
ENSG00000135521	474.136	234.065	714.208	3.05132	1.60944	1.33016e-06
ENSG00000066336	10.5728	2.43199	18.7136	7.6948	2.94388	1.36522e-06
ENSG00000145287	1126.78	749.687	1503.87	2.00599	1.00432	1.70552e-06
ENSG00000085231	517.977	283.311	752.642	2.65659	1.40958	1.74859e-06
ENSG00000138182	3425.43	2064.31	4786.55	2.31872	1.21333	2.51324e-06
ENSG00000115363	81.5112	53.5003	109.522	2.04713	1.0336	2.94327e-06
ENSG00000158050	87.3626	52.7351	121.99	2.31326	1.20993	3.47315e-06
ENSG00000127920	1187.73	650.048	1725.41	2.65428	1.40832	3.52842e-06
ENSG00000187678	22.8866	10.5143	35.259	3.35344	1.74564	4.17746e-06
ENSG00000198771	6.23585	0.26718	12.2045	45.679	5.51346	5.63032e-06
ENSG00000163017	39.3605	22.7016	56.0195	2.46765	1.30314	6.40687e-06
ENSG00000170627	4.37739	0	8.75479	Inf	Inf	6.41913e-06
ENSG00000105825	245.868	156.877	334.859	2.13453	1.09392	6.49339e-06
ENSG00000019582	13.2987	4.25308	22.3443	5.25366	2.39332	6.7177e-06
ENSG00000165025	5.28902	0.26718	10.3109	38.5915	5.27021	6.88215e-06
ENSG00000155115	1175.37	753.981	1596.76	2.11777	1.08254	7.769e-06
ENSG00000155629	5.95238	0.53436	11.3704	21.2786	4.41133	8.33716e-06
ENSG00000160214	1238.92	771.656	1706.18	2.21106	1.14474	8.96717e-06
ENSG00000075340	5.05165	0.30115	9.80215	32.5491	5.02454	1.14438e-05
ENSG00000104267	36.9477	19.0113	54.8841	2.88693	1.52954	1.16663e-05
ENSG00000186517	14.8588	5.50684	24.2107	4.39647	2.13634	1.33693e-05
ENSG00000176153	13.4583	4.93951	21.9772	4.44927	2.15357	1.58379e-05
ENSG00000081237	4.92159	0.342715	9.50046	27.7211	4.79291	1.78909e-05
ENSG00000088986	6518.29	4259.32	8777.27	2.06072	1.04315	1.80124e-05
ENSG00000197471	17.0482	7.44703	26.6494	3.57853	1.83937	2.00568e-05
ENSG00000275342	46.7935	29.0278	64.5593	2.22405	1.15319	2.30422e-05
ENSG00000111859	57.8524	38.1752	77.5296	2.03089	1.02211	2.43788e-05
ENSG00000198053	4.73805	0.342715	9.13339	26.6501	4.73607	2.88262e-05
ENSG00000144674	2440.22	1612.43	3268	2.02676	1.01918	2.92623e-05
ENSG00000186818	3.83144	0	7.66288	Inf	Inf	2.97806e-05
ENSG00000120280	3.8167	0	7.6334	Inf	Inf	3.00787e-05
ENSG00000170289	5.43303	0.53436	10.3317	19.3347	4.27312	3.18029e-05
ENSG00000177675	34.3915	20.009	48.774	2.4376	1.28546	3.29053e-05
ENSG00000138778	1830.86	885.044	2776.67	3.13732	1.64953	3.94114e-05
ENSG00000182162	6.26016	0.53436	11.986	22.4305	4.48739	4.05584e-05
ENSG00000240204	71.8897	44.6494	99.13	2.22019	1.15068	4.63987e-05
ENSG00000101336	3.65688	0	7.31376	Inf	Inf	4.94926e-05
ENSG00000138964	6.44525	1.29533	11.5952	8.95155	3.16214	5.7479e-05
ENSG00000128283	809.674	533.378	1085.97	2.03602	1.02575	5.85246e-05
ENSG00000145920	8.59877	2.50752	14.69	5.85839	2.5505	7.67107e-05
ENSG00000081189	3.50604	0	7.01207	Inf	Inf	8.10193e-05
ENSG00000134028	3.49418	0	6.98836	Inf	Inf	8.16619e-05
ENSG00000163584	794.826	520.451	1069.2	2.05438	1.0387	9.60831e-05
ENSG00000170323	9.89525	3.27509	16.5154	5.04274	2.33421	0.000103153
ENSG00000005844	5.62068	0.986581	10.2548	10.3943	3.37772	0.000104672
ENSG00000104671	563.443	374.765	752.122	2.00691	1.00498	0.000112625
ENSG00000129675	3.27972	0	6.55944	Inf	Inf	0.000139604
ENSG00000119535	9.67267	3.26749	16.0779	4.92054	2.29882	0.000144559
ENSG00000118193	2400.58	1516.07	3285.1	2.16686	1.11561	0.000165025
ENSG00000134516	23.8635	13.2135	34.5135	2.612	1.38515	0.000177175
ENSG00000048162	1040.08	582.095	1498.06	2.57356	1.36377	0.00019114
ENSG00000169896	3.98586	0.26718	7.70455	28.8366	4.84983	0.000195067
ENSG00000019186	14.4446	4.5958	24.2933	5.28599	2.40217	0.000195314
ENSG00000128815	3.98202	0.30115	7.66288	25.4454	4.66933	0.000195481
ENSG00000047617	39.2839	25.2639	53.3039	2.10989	1.07716	0.000212202
ENSG00000077420	3.10372	0	6.20744	Inf	Inf	0.000232735
ENSG00000100365	8.81841	3.06826	14.5686	4.74816	2.24737	0.000293745
ENSG00000004468	7.83456	2.49993	13.1692	5.26784	2.39721	0.000317951
ENSG00000178726	18.4416	9.74313	27.1401	2.78557	1.47797	0.000345624
ENSG00000105383	11.9633	5.24825	18.6784	3.55898	1.83146	0.000382559
ENSG00000198692	2.9173	0	5.8346	Inf	Inf	0.000391012
ENSG00000185862	8.67436	3.18536	14.1634	4.4464	2.15264	0.000405022
ENSG00000231924	16.8294	8.50716	25.1516	2.95652	1.5639	0.000412761
ENSG00000064961	2810.12	1815.04	3805.19	2.09647	1.06796	0.000413159
ENSG00000157653	37.6118	21.6659	53.5577	2.47198	1.30567	0.000414066
ENSG00000163735	9.99888	3.95293	16.0448	4.05898	2.02112	0.000438064
ENSG00000166428	6.10692	1.56251	10.6513	6.81683	2.7691	0.000454742
ENSG00000130755	6.61323	1.85606	11.3704	6.1261	2.61497	0.000467468
ENSG00000122483	854.574	553.578	1155.57	2.08746	1.06175	0.000558828
ENSG00000255587	4.84478	0.911045	8.77851	9.63564	3.26838	0.00057307
ENSG00000158125	9.80803	3.9793	15.6368	3.92952	1.97435	0.000594682
ENSG00000125148	6679.47	4270.01	9088.93	2.12855	1.08987	0.000603732
ENSG00000133055	4.49122	0	8.98245	Inf	Inf	0.000649714
ENSG00000102445	2.74562	0	5.49125	Inf	Inf	0.000650907
ENSG00000147206	2.73233	0	5.46465	Inf	Inf	0.000656762
ENSG00000154277	15.7014	7.88967	23.5131	2.98024	1.57543	0.000678469
ENSG00000165502	2663.31	1742.59	3584.03	2.05673	1.04035	0.000684868
ENSG00000115844	12.4309	5.89971	18.9621	3.21408	1.68441	0.000693217
ENSG00000131652	574.872	377.14	772.604	2.04859	1.03463	0.000719439
ENSG00000151136	8.26957	3.06826	13.4709	4.39041	2.13435	0.000783155
ENSG00000164687	265.98	149.692	382.267	2.5537	1.35259	0.000785687
ENSG00000147443	3.44135	0.26718	6.61552	24.7606	4.62997	0.00080204
ENSG00000254093	158.052	93.1309	222.973	2.39419	1.25954	0.000946786
ENSG00000115009	3.05485	0	6.10969	Inf	Inf	0.000953143
ENSG00000239998	2.56818	0	5.13637	Inf	Inf	0.00108857
ENSG00000129824	2.73986	0	5.47972	Inf	Inf	0.00110901
ENSG00000137462	3.90034	0.53436	7.26633	13.5982	3.76534	0.00114432
ENSG00000186265	3.22016	0.30115	6.13917	20.3858	4.34949	0.00130892
ENSG00000173261	12.6152	6.1583	19.0721	3.09697	1.63086	0.00153402
ENSG00000105248	253.38	164.995	341.765	2.07137	1.05058	0.00156186
ENSG00000181634	3.7495	0.53436	6.96464	13.0336	3.70417	0.00174278
ENSG00000163563	2.39506	0	4.79013	Inf	Inf	0.00181662
ENSG00000124102	32.4789	20.4329	44.5249	2.17908	1.12372	0.00181775
ENSG00000026751	2.36991	0	4.73981	Inf	Inf	0.00184741
ENSG00000163739	3.06707	0.26718	5.86697	21.9589	4.45673	0.00205689
ENSG00000101306	24.2961	15.6388	32.9533	2.10714	1.07529	0.00230841
ENSG00000007237	24.2683	15.4878	33.0488	2.13386	1.09347	0.00230987
ENSG00000182568	8.08236	3.377	12.7877	3.78671	1.92094	0.00247017
ENSG00000170684	32.0475	20.3365	43.7584	2.15171	1.10549	0.00247635
ENSG00000102879	24.931	16.0977	33.7643	2.09747	1.06865	0.00252258
ENSG00000180535	22.7237	13.9309	31.5164	2.26234	1.17782	0.00265014
ENSG00000163083	22.4212	14.2492	30.5932	2.14701	1.10233	0.00276608
ENSG00000169933	8.47705	3.80285	13.1512	3.45826	1.79005	0.00292518
ENSG00000143333	2.21906	0	4.43813	Inf	Inf	0.00303975
ENSG00000198133	2.19246	0	4.38493	Inf	Inf	0.0030939
ENSG00000104055	2.15689	0	4.31378	Inf	Inf	0.00316922
ENSG00000148677	24.5446	16.0525	33.0366	2.05803	1.04127	0.0035695
ENSG00000148291	428.146	276.1	580.191	2.10138	1.07134	0.0035739
ENSG00000166342	7.00221	2.80867	11.1957	3.98614	1.99499	0.00371692
ENSG00000005108	3.34718	0.53436	6.16001	11.5278	3.52705	0.00418926
ENSG00000165606	7.27872	2.0477	12.5097	6.10916	2.61097	0.00426301
ENSG00000214967	13.0757	6.99381	19.1576	2.73923	1.45377	0.00426646
ENSG00000153993	22.8086	14.9534	30.6637	2.05062	1.03606	0.00431278
ENSG00000069482	900.203	594.564	1205.84	2.02811	1.02014	0.00442815
ENSG00000172716	2.89044	0.30115	5.47972	18.196	4.18555	0.0044824
ENSG00000123360	2.77366	0	5.54733	Inf	Inf	0.00449169
ENSG00000125144	24.8391	14.707	34.9713	2.37786	1.24966	0.00496901
ENSG00000152611	2.22339	0	4.44677	Inf	Inf	0.00498186
ENSG00000179542	2.02367	0	4.04734	Inf	Inf	0.00515556
ENSG00000177238	2.02079	0	4.04157	Inf	Inf	0.0051654
ENSG00000034053	2.01935	0	4.03869	Inf	Inf	0.00517034
ENSG00000138449	2.68847	0.26718	5.10977	19.1248	4.25737	0.00524597
ENSG00000100448	1.99419	0	3.98838	Inf	Inf	0.00525797
ENSG00000087589	2.6795	0.26718	5.09182	19.0576	4.2523	0.00526984
ENSG00000184838	21.5997	13.3372	29.8622	2.23902	1.16287	0.00548852
ENSG00000100055	3.72077	0.609895	6.83165	11.2014	3.4856	0.0056992
ENSG00000018236	6.66259	2.80108	10.5241	3.75717	1.90964	0.00581564
ENSG00000139292	3.21845	0.6023	5.8346	9.68721	3.27608	0.0062728
ENSG00000166501	10.1196	4.26266	15.9766	3.74802	1.90613	0.00664263
ENSG00000100077	6.06813	2.28091	9.85535	4.32079	2.11129	0.00664806
ENSG00000166206	3.71153	0.911045	6.51201	7.14785	2.83751	0.00668166
ENSG00000183019	2.15545	0	4.3109	Inf	Inf	0.00673168
ENSG00000138769	6.89813	2.73974	11.0565	4.03562	2.01279	0.00705065
ENSG00000074966	8.89554	4.30224	13.4888	3.1353	1.6486	0.00795213
ENSG00000131127	1.83581	0	3.67162	Inf	Inf	0.00870653
ENSG00000196126	1.83149	0	3.66297	Inf	Inf	0.00873143
ENSG00000145428	1.80921	0	3.61842	Inf	Inf	0.00886209
ENSG00000084110	5.96686	2.39802	9.53571	3.9765	1.9915	0.00899431
ENSG00000010671	5.90998	2.36405	9.45591	3.99989	1.99996	0.00908485
ENSG00000095970	2.48732	0.26718	4.70745	17.619	4.13906	0.0109022
ENSG00000113924	6.61333	2.99272	10.2339	3.41961	1.77383	0.0125764
ENSG00000122025	2.31564	0.26718	4.3641	16.3339	4.0298	0.0132029
ENSG00000151883	18.914	12.5016	25.3263	2.02584	1.01852	0.013548
ENSG00000123329	3.42533	0.986581	5.86409	5.94385	2.5714	0.0142859
ENSG00000012817	2.87313	0.609895	5.13637	8.42172	3.07411	0.0144375
ENSG00000113749	1.66125	0	3.3225	Inf	Inf	0.0145852
ENSG00000187559	1.65981	0	3.31962	Inf	Inf	0.0145989
ENSG00000004809	1.65837	0	3.31674	Inf	Inf	0.0146126
ENSG00000122122	1.64795	0	3.2959	Inf	Inf	0.0147127
ENSG00000133561	1.64507	0	3.29014	Inf	Inf	0.0147406
ENSG00000068831	14.2441	8.69121	19.7969	2.27781	1.18765	0.0147989
ENSG00000226979	1.63609	0	3.27219	Inf	Inf	0.0148284
ENSG00000154654	1.63465	0	3.2693	Inf	Inf	0.0148426
ENSG00000115828	4.77662	1.82209	7.73115	4.24301	2.08509	0.0158237
ENSG00000171560	16.8169	10.9052	22.7286	2.08421	1.0595	0.0162837
ENSG00000171345	5.50139	2.23935	8.76344	3.91339	1.96842	0.0170138
ENSG00000162366	8.41096	4.40415	12.4178	2.81956	1.49547	0.0171198
ENSG00000090376	13.7888	8.60907	18.9686	2.20332	1.13968	0.0171925
ENSG00000080709	3.4327	0.26718	6.59823	24.6958	4.6262	0.017233
ENSG00000156206	6.73983	3.23352	10.2461	3.16872	1.6639	0.019111
ENSG00000175820	5.11143	2.24034	7.98252	3.56308	1.83313	0.0191939
ENSG00000151702	3.38063	0.609895	6.15136	10.0859	3.33427	0.019526
ENSG00000139626	3.66532	1.17063	6.16001	5.26213	2.39565	0.0199982
ENSG00000109452	11.6749	5.97326	17.3766	2.90906	1.54055	0.0210304
ENSG00000111335	3.19222	0.86948	5.51497	6.34284	2.66513	0.021326
ENSG00000187908	7.05743	3.53467	10.5802	2.99326	1.58172	0.0214112
ENSG00000121552	4.49239	1.67102	7.31376	4.37683	2.12989	0.0224099
ENSG00000182676	5.1807	2.0477	8.31369	4.06	2.02148	0.0225349
ENSG00000135547	9.4885	5.23966	13.7373	2.6218	1.39056	0.0240596
ENSG00000011600	1.48381	0	2.96762	Inf	Inf	0.0244975
ENSG00000188848	1.48381	0	2.96762	Inf	Inf	0.0244975
ENSG00000134061	1.47195	0	2.9439	Inf	Inf	0.0246854
ENSG00000138075	1.47195	0	2.9439	Inf	Inf	0.0246854
ENSG00000125355	1.47051	0	2.94102	Inf	Inf	0.0247085
ENSG00000101307	1.45865	0	2.9173	Inf	Inf	0.0249002
ENSG00000183324	1.44535	0	2.8907	Inf	Inf	0.0251195
ENSG00000184368	4.01193	1.43781	6.58604	4.58061	2.19554	0.025341
ENSG00000169508	8.91396	4.93092	12.897	2.61554	1.38711	0.0256225
ENSG00000265107	11.9048	7.41565	16.394	2.21072	1.14452	0.0261444
ENSG00000189269	4.87516	2.08167	7.66865	3.68388	1.88123	0.0264711
ENSG00000115339	1.48669	0	2.97338	Inf	Inf	0.0271812
ENSG00000118307	8.14543	4.54763	11.7432	2.58228	1.36864	0.0279104
ENSG00000178623	3.57447	1.28773	5.8612	4.55158	2.18637	0.0279909
ENSG00000110328	2.72517	0.609895	4.84044	7.93651	2.98851	0.0283424
ENSG00000022556	3.45823	1.10269	5.81377	5.27236	2.39845	0.0287684
ENSG00000238243	11.1868	6.97962	15.394	2.20557	1.14115	0.0290702
ENSG00000175197	70.7758	42.8135	98.7381	2.30623	1.20554	0.0304914
ENSG00000131080	3.04133	0.911045	5.17161	5.67657	2.50502	0.0309089
ENSG00000135205	2.99106	0.86948	5.11265	5.88013	2.55585	0.031338
ENSG00000284753	53.943	34.1569	73.7292	2.15855	1.11006	0.0321695
ENSG00000050628	1.98057	0.342715	3.61842	10.5581	3.40028	0.0322202
ENSG00000164509	8.77354	5.12355	12.4235	2.42479	1.27786	0.0322722
ENSG00000101493	10.3444	6.52839	14.1605	2.16906	1.11707	0.0324734
ENSG00000146678	6.42463	3.34303	9.50623	2.8436	1.50772	0.0327612
ENSG00000148468	1.93094	0.26718	3.59471	13.4543	3.74999	0.0329433
ENSG00000167077	2.5011	0.643865	4.35833	6.76901	2.75895	0.032963
ENSG00000171561	1.61847	0	3.23694	Inf	Inf	0.0340749
ENSG00000150337	12.5425	8.30891	16.7761	2.01905	1.01368	0.0345241
ENSG00000152661	3.89447	1.55491	6.23404	4.00926	2.00334	0.0350116
ENSG00000108691	55.3212	36.5935	74.0488	2.02355	1.01689	0.0352064
ENSG00000179133	9.39069	5.51444	13.2669	2.40586	1.26655	0.0364571
ENSG00000172322	3.0714	0.26718	5.87561	21.9912	4.45886	0.037499
ENSG00000171557	8.34357	5.01504	11.6721	2.32742	1.21873	0.0379616
ENSG00000133328	19.7145	12.9641	26.465	2.04141	1.02957	0.0380264
ENSG00000205038	2.78937	0.53436	5.04438	9.44005	3.2388	0.0381467
ENSG00000113396	1.44391	0	2.88782	Inf	Inf	0.0386871
ENSG00000173200	1.44968	0	2.89935	Inf	Inf	0.0389637
ENSG00000188869	3.34371	1.17822	5.5092	4.67585	2.22523	0.0402696
ENSG00000157399	2.55889	0.342715	4.77506	13.933	3.80044	0.0403208
ENSG00000152760	1.81675	0	3.63349	Inf	Inf	0.0411988
ENSG00000149294	4.99412	2.32248	7.66576	3.30068	1.72276	0.0413155
ENSG00000167208	1.29739	0	2.59478	Inf	Inf	0.0414101
ENSG00000072133	1.28553	0	2.57107	Inf	Inf	0.0417242
ENSG00000186074	1.28553	0	2.57107	Inf	Inf	0.0417242
ENSG00000147180	1.28409	0	2.56818	Inf	Inf	0.0417628
ENSG00000283740	1.28409	0	2.56818	Inf	Inf	0.0417628
ENSG00000175857	1.25893	0	2.51787	Inf	Inf	0.0424518
ENSG00000109667	2.44394	0.56833	4.31955	7.60042	2.92608	0.0428898
ENSG00000182985	2.34876	0.685431	4.01209	5.85339	2.54927	0.0488661
ENSG00000188626	2.33086	0.643865	4.01786	6.24022	2.6416	0.0491384
ENSG00000036448	3.63488	1.41143	5.85832	4.15061	2.05332	0.0493997
ENSG00000131398	1.25749	0	2.51499	Inf	Inf	0.0494164
ENSG00000104081	434.674	789.68	79.668	0.100886	-3.3092	1.80643e-86
ENSG00000175305	523.67	926.381	120.959	0.130571	-2.93709	1.90435e-76
ENSG00000165891	1544.95	2561.37	528.537	0.206349	-2.27684	4.30255e-62
ENSG00000105173	454.714	778.659	130.768	0.16794	-2.57398	6.72663e-60
ENSG00000185567	4705.92	7454.23	1957.62	0.262618	-1.92896	1.1697e-49
ENSG00000129173	584.577	922.908	246.245	0.266814	-1.90609	1.5697e-38
ENSG00000189057	1541.64	2361.58	721.697	0.3056	-1.71028	2.07604e-37
ENSG00000069702	1651.66	2522.65	780.675	0.309466	-1.69215	9.35035e-37
ENSG00000092470	1543.67	2345.47	741.878	0.316302	-1.66062	1.52566e-35
ENSG00000137310	2931.67	4402.66	1460.69	0.331774	-1.59173	9.79472e-35
ENSG00000078900	179.288	298.517	60.058	0.201188	-2.31339	2.48262e-34
ENSG00000100297	2304.28	3411.95	1196.6	0.350708	-1.51166	4.41522e-31
ENSG00000266173	200.354	323.467	77.2419	0.238794	-2.06616	2.26181e-30
ENSG00000166963	117.917	199.51	36.3237	0.182064	-2.45748	8.92387e-30
ENSG00000076248	1951.37	2858.54	1044.2	0.365293	-1.45288	1.54606e-28
ENSG00000143476	2374.73	3460.03	1289.43	0.372664	-1.42405	8.91825e-28
ENSG00000108306	628.184	935.2	321.168	0.343422	-1.54195	6.01081e-27
ENSG00000180998	160.874	258.749	63.0003	0.243481	-2.03812	9.05377e-27
ENSG00000268089	320.259	490.176	150.342	0.306709	-1.70506	1.13193e-26
ENSG00000185591	4790.12	6891.69	2688.54	0.390114	-1.35803	1.96277e-26
ENSG00000160298	789.772	1160.77	418.772	0.36077	-1.47085	5.04236e-26
ENSG00000141314	79.3998	136.47	22.3292	0.163619	-2.61158	9.45837e-26
ENSG00000117643	53.6871	96.6667	10.7074	0.110766	-3.17441	1.77488e-25
ENSG00000094916	8355.48	11924.6	4786.34	0.401383	-1.31695	3.16353e-25
ENSG00000132694	820.654	1198.37	442.936	0.369615	-1.4359	6.89194e-25
ENSG00000135127	225.192	346.54	103.843	0.299658	-1.73861	2.34797e-24
ENSG00000253729	15210.9	21519.6	8902.21	0.413679	-1.27342	6.95244e-24
ENSG00000186767	549.308	806.421	292.195	0.362336	-1.4646	7.02775e-24
ENSG00000058668	2248.75	3206.82	1290.67	0.402475	-1.31303	8.81495e-24
ENSG00000163257	2093.49	2985.94	1201.04	0.402233	-1.3139	9.32631e-24
ENSG00000079308	491.147	722.127	260.167	0.36028	-1.47281	1.40428e-23
ENSG00000115687	499.019	731.643	266.396	0.364107	-1.45757	3.33324e-23
ENSG00000138376	864.243	1242.93	485.552	0.39065	-1.35605	6.87011e-23
ENSG00000179240	522.789	762.625	282.954	0.371026	-1.43041	9.97548e-23
ENSG00000168679	174.535	270.626	78.444	0.289861	-1.78656	1.24123e-22
ENSG00000087266	1041.68	1489.11	594.25	0.399064	-1.32531	1.63436e-22
ENSG00000132016	156.008	243.857	68.1586	0.279503	-1.83907	1.90357e-22
ENSG00000092853	1537.31	2180.84	893.773	0.40983	-1.2869	2.27144e-22
ENSG00000153094	721.903	1038.12	405.687	0.390791	-1.35553	3.94025e-22
ENSG00000152104	3547.64	5038.14	2057.14	0.408314	-1.29225	4.85932e-22
ENSG00000121454	190.003	291.998	88.0068	0.301395	-1.73027	6.25619e-22
ENSG00000227051	265.235	396.177	134.293	0.338972	-1.56076	2.25778e-21
ENSG00000197119	648.087	929.845	366.329	0.393967	-1.34385	2.59687e-21
ENSG00000116062	4174.54	5828	2521.08	0.43258	-1.20896	3.5499e-21
ENSG00000103319	2789.46	3901.15	1677.77	0.430072	-1.21735	4.36651e-21
ENSG00000007968	1095.27	1548.53	642.011	0.414594	-1.27023	4.52329e-21
ENSG00000118596	1956.87	2745.84	1167.9	0.425333	-1.23333	3.6364e-20
ENSG00000148730	5725.23	7922.7	3527.76	0.445273	-1.16724	3.90746e-20
ENSG00000173821	6041.51	8344.26	3738.76	0.448065	-1.15822	7.81194e-20
ENSG00000073111	3506.14	4843.39	2168.88	0.447802	-1.15907	1.83998e-19
ENSG00000162512	604.765	858.382	351.147	0.40908	-1.28954	2.26061e-19
ENSG00000173166	163.232	253.325	73.1392	0.288716	-1.79228	2.79905e-19
ENSG00000182378	748.096	1052.58	443.614	0.421455	-1.24655	3.06974e-19
ENSG00000250722	493.266	702.519	284.013	0.404277	-1.30658	3.23644e-19
ENSG00000132688	550.393	781.971	318.814	0.407706	-1.2944	3.45625e-19
ENSG00000164142	702.76	991.007	414.513	0.418274	-1.25748	5.27867e-19
ENSG00000173517	1260.06	1792.02	728.089	0.406294	-1.2994	6.27778e-19
ENSG00000242498	1724.18	2386.12	1062.25	0.445181	-1.16754	6.34909e-19
ENSG00000054654	2138.29	2950.83	1325.74	0.449277	-1.15432	8.57153e-19
ENSG00000115112	294.096	427.785	160.406	0.374969	-1.41516	1.12006e-18
ENSG00000141298	993.663	1412.27	575.061	0.40719	-1.29623	2.4358e-18
ENSG00000137502	1228.79	1700.86	756.711	0.444898	-1.16845	2.65899e-18
ENSG00000101412	1222.13	1687.44	756.82	0.448501	-1.15682	2.86191e-18
ENSG00000153048	632.433	886.788	378.077	0.426344	-1.22991	3.11941e-18
ENSG00000172667	727.44	1016.49	438.391	0.43128	-1.2133	3.65989e-18
ENSG00000081052	510.316	720.257	300.375	0.417039	-1.26175	4.1437e-18
ENSG00000105011	4529.36	6168.53	2890.19	0.468538	-1.09376	4.66929e-18
ENSG00000066923	158.919	239.589	78.249	0.326596	-1.61442	4.73762e-18
ENSG00000165244	1101.28	1522.86	679.687	0.446322	-1.16384	4.96102e-18
ENSG00000128578	831.368	1156.2	506.533	0.4381	-1.19067	5.02764e-18
ENSG00000112029	1113.02	1535.72	690.325	0.449511	-1.15357	6.95579e-18
ENSG00000139132	850.338	1180.6	520.073	0.440514	-1.18274	7.64293e-18
ENSG00000182963	1476.9	2032.29	921.497	0.453427	-1.14106	7.68924e-18
ENSG00000155846	885.517	1226.58	544.451	0.443876	-1.17177	1.1869e-17
ENSG00000135378	339.978	485.925	194.032	0.399303	-1.32444	1.50385e-17
ENSG00000168172	1318.49	1812.19	824.799	0.45514	-1.13562	1.61215e-17
ENSG00000131711	268.644	388.367	148.92	0.383453	-1.38288	1.6842e-17
ENSG00000121753	387.289	549.562	225.016	0.409445	-1.28826	2.25974e-17
ENSG00000269825	197.952	318.929	76.9749	0.241354	-2.05078	2.57034e-17
ENSG00000102362	153.634	230.338	76.9294	0.333985	-1.58215	2.84228e-17
ENSG00000137460	234.425	340.747	128.102	0.375944	-1.41141	3.73312e-17
ENSG00000184307	368.162	522.131	214.192	0.410227	-1.28551	3.90998e-17
ENSG00000078804	1111.32	1525.29	697.352	0.457192	-1.12913	3.94379e-17
ENSG00000180592	467.062	654.305	279.819	0.427659	-1.22547	5.97841e-17
ENSG00000166025	689.254	955.931	422.576	0.442057	-1.1777	6.44533e-17
ENSG00000187189	536.436	746.633	326.238	0.436946	-1.19447	8.70775e-17
ENSG00000119969	3724.46	5029.42	2419.5	0.48107	-1.05568	9.26333e-17
ENSG00000176438	301.897	430.08	173.715	0.403913	-1.30788	1.12859e-16
ENSG00000235194	306.251	436.178	176.324	0.404249	-1.30668	1.16607e-16
ENSG00000115902	692.16	954.488	429.832	0.450327	-1.15096	1.64586e-16
ENSG00000214029	258.418	370.503	146.332	0.394955	-1.34024	2.32695e-16
ENSG00000164187	2229.03	3015.09	1442.98	0.478585	-1.06315	2.88603e-16
ENSG00000185561	302.185	429.228	175.142	0.408039	-1.29322	3.39387e-16
ENSG00000030419	103.733	159.754	47.7125	0.298662	-1.74341	3.56263e-16
ENSG00000112414	1713.67	2319.94	1107.4	0.477339	-1.06691	4.87327e-16
ENSG00000150893	219.036	316.228	121.845	0.385308	-1.37592	5.21621e-16
ENSG00000100490	881.55	1203.42	559.683	0.465078	-1.10445	6.41238e-16
ENSG00000128191	532.946	736.831	329.06	0.446588	-1.16298	6.96969e-16
ENSG00000109906	554.016	766.014	342.017	0.446489	-1.1633	6.98827e-16
ENSG00000112210	245.74	351.431	140.048	0.398509	-1.32732	7.96232e-16
ENSG00000197594	2778.15	3730.01	1826.29	0.48962	-1.03027	9.61465e-16
ENSG00000100167	220.564	317.561	123.568	0.389115	-1.36173	1.01455e-15
ENSG00000159082	699.664	959.07	440.259	0.459047	-1.12329	1.1945e-15
ENSG00000249915	585.408	808.403	362.413	0.448307	-1.15744	1.28509e-15
ENSG00000125885	917.742	1246.72	588.76	0.472246	-1.08239	1.66269e-15
ENSG00000159259	805.095	1095.05	515.137	0.470422	-1.08797	1.87618e-15
ENSG00000156030	1055.18	1427.53	682.821	0.478323	-1.06394	2.10944e-15
ENSG00000166483	1369	1842.9	895.097	0.4857	-1.04186	3.41236e-15
ENSG00000167525	264.108	373.807	154.41	0.413075	-1.27553	3.44205e-15
ENSG00000111674	799.388	1084.43	514.341	0.474294	-1.07615	4.41982e-15
ENSG00000228486	133.911	198.606	69.2164	0.34851	-1.52073	4.47925e-15
ENSG00000198901	51.7351	85.289	18.1812	0.213172	-2.22991	4.52513e-15
ENSG00000163683	997.393	1347.75	647.034	0.480084	-1.05864	4.64078e-15
ENSG00000146858	218.026	312.282	123.769	0.396338	-1.3352	5.01893e-15
ENSG00000221890	522.48	715.932	329.028	0.45958	-1.12161	6.14441e-15
ENSG00000170734	1181.21	1588.06	774.361	0.487614	-1.03619	1.01589e-14
ENSG00000068615	581.118	792.53	369.705	0.466486	-1.10009	1.03055e-14
ENSG00000170153	879.364	1187.55	571.175	0.480968	-1.05599	1.10933e-14
ENSG00000130517	837.569	1132.16	542.982	0.4796	-1.0601	1.13626e-14
ENSG00000134215	791.252	1069.22	513.283	0.480053	-1.05874	1.21176e-14
ENSG00000214357	1083.45	1457.24	709.655	0.486986	-1.03805	1.27288e-14
ENSG00000213160	550.411	751.984	348.839	0.463892	-1.10814	1.2971e-14
ENSG00000170899	261.511	367.838	155.184	0.421882	-1.24509	1.42103e-14
ENSG00000076555	624.815	848.681	400.949	0.472437	-1.08181	1.62704e-14
ENSG00000108590	123.647	183.685	63.609	0.346294	-1.52993	1.63753e-14
ENSG00000175643	327.635	453.91	201.36	0.443613	-1.17263	1.95838e-14
ENSG00000075303	1204.51	1612.44	796.574	0.494019	-1.01736	2.11918e-14
ENSG00000161048	422.739	582.186	263.292	0.452247	-1.14482	2.13015e-14
ENSG00000196935	740.639	1001.49	479.793	0.479081	-1.06166	2.25429e-14
ENSG00000116273	926.557	1245.26	607.852	0.488132	-1.03466	2.40417e-14
ENSG00000243335	391.274	539.512	243.036	0.450474	-1.15048	2.83328e-14
ENSG00000144029	361.91	500.108	223.711	0.447326	-1.1606	2.88647e-14
ENSG00000006283	154.557	224.301	84.8117	0.378115	-1.4031	3.56874e-14
ENSG00000174233	1212.15	1619.96	804.337	0.496518	-1.01008	4.20176e-14
ENSG00000118412	999.382	1356.1	642.662	0.473903	-1.07734	4.21211e-14
ENSG00000157999	58.7106	94.2163	23.2048	0.246292	-2.02156	4.32119e-14
ENSG00000161791	475.293	649.111	301.475	0.464443	-1.10643	4.97634e-14
ENSG00000143630	220.604	311.755	129.452	0.415237	-1.26799	5.72449e-14
ENSG00000238083	352.299	486.14	218.458	0.449373	-1.15401	5.98414e-14
ENSG00000185245	81.0223	124.401	37.6434	0.302597	-1.72453	7.05861e-14
ENSG00000143126	1123.86	1501.98	745.741	0.496504	-1.01012	7.43117e-14
ENSG00000169683	377.677	517.25	238.104	0.460326	-1.11927	7.54399e-14
ENSG00000186532	882.802	1181.27	584.332	0.494663	-1.01548	7.94534e-14
ENSG00000091622	239.818	335.672	143.965	0.428885	-1.22134	1.45118e-13
ENSG00000141750	309.794	427.252	192.335	0.450167	-1.15147	1.58481e-13
ENSG00000131470	303.627	418.795	188.458	0.450001	-1.152	1.94952e-13
ENSG00000135678	411.782	561.258	262.307	0.467355	-1.09741	2.56178e-13
ENSG00000171105	613.069	823.447	402.691	0.489031	-1.032	2.61223e-13
ENSG00000171219	198.926	281.107	116.744	0.4153	-1.26777	2.75069e-13
ENSG00000159110	104.307	160.543	48.0702	0.299422	-1.73975	2.89475e-13
ENSG00000175155	161.291	233.641	88.9413	0.380675	-1.39337	2.99129e-13
ENSG00000165300	743.936	994.296	493.577	0.496409	-1.0104	3.45091e-13
ENSG00000135913	499.345	738.182	260.508	0.352905	-1.50265	4.10778e-13
ENSG00000071246	219.37	307.636	131.103	0.426163	-1.23052	4.15752e-13
ENSG00000197852	197.204	278.324	116.085	0.417084	-1.26159	4.53224e-13
ENSG00000173480	223.775	327.374	120.176	0.36709	-1.44579	5.48761e-13
ENSG00000163945	516.113	693.38	338.847	0.488689	-1.03301	1.09875e-12
ENSG00000185219	816.559	1110.61	522.508	0.470469	-1.08783	1.29014e-12
ENSG00000150455	189.802	266.338	113.267	0.425276	-1.23353	1.90792e-12
ENSG00000176884	54.1197	85.697	22.5424	0.263048	-1.9266	1.99978e-12
ENSG00000142396	84.002	126.236	41.7681	0.330874	-1.59565	2.18547e-12
ENSG00000259494	109.164	159.485	58.843	0.368957	-1.43847	2.48466e-12
ENSG00000164663	363.293	491.156	235.43	0.479337	-1.06089	2.69736e-12
ENSG00000114790	89.8642	133.786	45.9427	0.343405	-1.54202	3.4523e-12
ENSG00000065413	149.306	211.931	86.6814	0.409008	-1.2898	3.61968e-12
ENSG00000120899	490.011	654.151	325.871	0.498159	-1.00532	4.31804e-12
ENSG00000077157	1047.12	1404.12	690.12	0.491496	-1.02475	4.60486e-12
ENSG00000128408	111.005	161.411	60.5997	0.375437	-1.41336	4.63086e-12
ENSG00000184465	476.088	635.063	317.112	0.49934	-1.00191	6.95153e-12
ENSG00000104728	43.3959	70.1221	16.6697	0.237724	-2.07264	7.52623e-12
ENSG00000013619	361.398	486.252	236.545	0.486465	-1.03959	8.1084e-12
ENSG00000214021	233.241	320.354	146.128	0.456144	-1.13244	8.32387e-12
ENSG00000186951	418.802	559.75	277.855	0.496392	-1.01045	9.90802e-12
ENSG00000145882	251.702	344.053	159.352	0.46316	-1.11042	1.10575e-11
ENSG00000143494	211.555	290.935	132.174	0.454307	-1.13826	1.30011e-11
ENSG00000115556	97.6069	142.223	52.9907	0.372589	-1.42434	1.40078e-11
ENSG00000171877	48.7557	77.0637	20.4477	0.265335	-1.91411	1.58365e-11
ENSG00000185269	98.8385	144.036	53.641	0.372414	-1.42502	1.59936e-11
ENSG00000135437	39.8231	64.8673	14.7789	0.227833	-2.13395	1.60826e-11
ENSG00000139537	342.906	459.984	225.827	0.490945	-1.02637	1.90873e-11
ENSG00000114646	71.6005	108.057	35.1435	0.32523	-1.62047	2.15878e-11
ENSG00000103723	178.702	247.361	110.042	0.444865	-1.16856	3.03478e-11
ENSG00000269858	126.964	180.85	73.0769	0.404074	-1.30731	3.14638e-11
ENSG00000183718	485.264	661.862	308.667	0.466362	-1.10048	3.25662e-11
ENSG00000170776	3699.01	4947.21	2450.8	0.495391	-1.01336	3.48067e-11
ENSG00000278384	152.012	213.185	90.8392	0.426104	-1.23072	3.51896e-11
ENSG00000134986	60.4398	92.5621	28.3174	0.305929	-1.70873	3.52199e-11
ENSG00000106031	275.407	372.586	178.228	0.478354	-1.06385	3.55843e-11
ENSG00000106689	116.891	166.653	67.1299	0.402812	-1.31182	3.59319e-11
ENSG00000099910	183.86	254.468	113.253	0.445057	-1.16794	4.1949e-11
ENSG00000136842	173.877	241.476	106.279	0.440121	-1.18403	4.48462e-11
ENSG00000183196	27.2017	46.3944	8.00912	0.172631	-2.53423	4.63153e-11
ENSG00000169891	261.888	354.935	168.841	0.475696	-1.07189	4.74745e-11
ENSG00000121858	57.538	88.377	26.699	0.302104	-1.72688	4.87044e-11
ENSG00000184194	225.497	306.841	144.154	0.469799	-1.08988	5.20046e-11
ENSG00000183762	224.343	306.306	142.379	0.464824	-1.10524	5.41532e-11
ENSG00000136828	175.532	242.439	108.626	0.448055	-1.15825	5.8343e-11
ENSG00000214193	236.45	320.235	152.665	0.47673	-1.06876	6.25866e-11
ENSG00000170921	2287.25	3076.34	1498.16	0.486993	-1.03803	9.63975e-11
ENSG00000139194	203.578	301.813	105.342	0.34903	-1.51858	9.74442e-11
ENSG00000163357	54.9385	84.234	25.643	0.304426	-1.71584	1.03421e-10
ENSG00000165801	263.88	354.142	173.618	0.490248	-1.02842	1.23909e-10
ENSG00000137941	427.595	573.492	281.698	0.491198	-1.02562	1.46452e-10
ENSG00000167549	186.828	255.935	117.72	0.459959	-1.12042	1.60138e-10
ENSG00000083812	202.794	275.939	129.649	0.469847	-1.08974	1.64371e-10
ENSG00000116985	164.996	227.598	102.394	0.449889	-1.15236	1.70019e-10
ENSG00000127129	61.3845	92.6792	30.0898	0.324666	-1.62297	2.40275e-10
ENSG00000165105	237.591	319.408	155.773	0.487694	-1.03595	2.4035e-10
ENSG00000196159	474.03	688.504	259.556	0.376985	-1.40742	2.48412e-10
ENSG00000048052	79.4968	115.962	43.0312	0.371079	-1.4302	2.64039e-10
ENSG00000148225	103.027	146.468	59.5854	0.406815	-1.29755	4.71487e-10
ENSG00000115896	16.4804	29.6706	3.29014	0.110889	-3.17282	7.20347e-10
ENSG00000009724	59.1992	88.5063	29.8921	0.33774	-1.56602	9.2203e-10
ENSG00000134253	202.678	272.423	132.933	0.487967	-1.03514	9.70712e-10
ENSG00000131503	98.5225	139.968	57.0766	0.407782	-1.29413	9.91878e-10
ENSG00000064309	193.602	265.302	121.901	0.459481	-1.12192	1.11445e-09
ENSG00000184949	218.052	295.711	140.393	0.474762	-1.07472	1.17225e-09
ENSG00000102053	91.8154	130.951	52.6801	0.40229	-1.31369	1.19562e-09
ENSG00000141854	57.9826	86.6598	29.3054	0.338165	-1.5642	1.39481e-09
ENSG00000213020	186.261	251.553	120.97	0.480892	-1.05622	1.67471e-09
ENSG00000163072	126.264	174.93	77.5977	0.443592	-1.1727	1.86915e-09
ENSG00000120093	163.496	221.62	105.371	0.475457	-1.07261	2.09696e-09
ENSG00000161664	61.6782	91.1157	32.2406	0.353842	-1.49882	2.1176e-09
ENSG00000124942	40631.1	54244	27018.2	0.498088	-1.00553	2.18965e-09
ENSG00000104894	118.077	181.141	55.0118	0.303695	-1.7193	2.45121e-09
ENSG00000106714	146.132	199.843	92.4212	0.462468	-1.11258	2.49952e-09
ENSG00000132386	168.609	228.313	108.904	0.476995	-1.06795	2.50347e-09
ENSG00000197102	10704.2	14488	6920.33	0.477659	-1.06595	2.989e-09
ENSG00000128596	62.1783	91.5831	32.7735	0.357855	-1.48255	3.50159e-09
ENSG00000185946	549.663	755.684	343.642	0.454744	-1.13687	3.93128e-09
ENSG00000178917	106.712	148.406	65.0181	0.438111	-1.19063	5.64967e-09
ENSG00000146197	40.8735	62.9063	18.8407	0.299504	-1.73935	6.35633e-09
ENSG00000090238	82.3426	116.867	47.8184	0.40917	-1.28923	6.51584e-09
ENSG00000135314	139.785	189.905	89.6659	0.472163	-1.08264	7.50028e-09
ENSG00000233757	117.5	161.89	73.1099	0.451602	-1.14688	8.94664e-09
ENSG00000117281	37.3475	58.4843	16.2106	0.277179	-1.85111	9.64817e-09
ENSG00000008735	119.835	164.912	74.7573	0.453315	-1.14141	9.6522e-09
ENSG00000177455	56.3009	83.0826	29.5193	0.3553	-1.49289	9.92091e-09
ENSG00000127329	135.869	185.037	86.7014	0.468562	-1.09369	1.02706e-08
ENSG00000176681	83.8165	120.219	47.4139	0.394396	-1.34228	1.41088e-08
ENSG00000186583	19.2392	33.0166	5.46177	0.165425	-2.59575	1.50477e-08
ENSG00000179841	147.419	198.535	96.3031	0.48507	-1.04374	1.74723e-08
ENSG00000182575	36.9706	57.0917	16.8495	0.29513	-1.76058	1.76718e-08
ENSG00000188992	32.4756	51.3441	13.6072	0.26502	-1.91583	1.80665e-08
ENSG00000139438	29.3012	50.1464	8.45598	0.168626	-2.5681	2.12906e-08
ENSG00000184619	106.988	147.162	66.8136	0.454012	-1.1392	2.30397e-08
ENSG00000123405	77.4671	109.362	45.5723	0.41671	-1.26288	2.38769e-08
ENSG00000151882	83.7407	117.613	49.8688	0.424009	-1.23783	2.47732e-08
ENSG00000170915	92.4851	128.687	56.2837	0.43737	-1.19307	2.57976e-08
ENSG00000141519	48.4441	72.1474	24.7407	0.342918	-1.54406	2.85006e-08
ENSG00000187242	24.0438	39.4098	8.67788	0.220196	-2.18314	2.88742e-08
ENSG00000232434	114.763	156.665	72.861	0.465074	-1.10447	2.98245e-08
ENSG00000239779	91.9386	127.845	56.0323	0.438284	-1.19006	3.05815e-08
ENSG00000198466	717.795	957.815	477.775	0.498818	-1.00342	3.77388e-08
ENSG00000149634	42.8052	64.414	21.1963	0.329063	-1.60356	3.86995e-08
ENSG00000103888	60.2579	87.0735	33.4423	0.384069	-1.38056	4.86776e-08
ENSG00000180720	39.6285	60.3394	18.9176	0.31352	-1.67337	4.97181e-08
ENSG00000080644	39.5571	60.2527	18.8615	0.31304	-1.67558	5.04803e-08
ENSG00000174871	56.6769	82.0656	31.2881	0.381257	-1.39116	5.21004e-08
ENSG00000213413	31.4733	49.2538	13.6928	0.278005	-1.84682	5.79367e-08
ENSG00000100150	138.096	184.266	91.9266	0.498881	-1.00323	6.5363e-08
ENSG00000184047	98.1987	134.889	61.5083	0.455992	-1.13292	6.67953e-08
ENSG00000285938	22.0786	37.0563	7.10097	0.191627	-2.38363	6.79693e-08
ENSG00000187634	56.8498	82.2227	31.477	0.382826	-1.38524	8.81942e-08
ENSG00000254469	41.0151	61.4583	20.5719	0.334729	-1.57894	1.19755e-07
ENSG00000217555	13.9659	24.6626	3.2693	0.132561	-2.91527	1.24507e-07
ENSG00000283297	28.2285	44.3796	12.0773	0.272136	-1.8776	1.31473e-07
ENSG00000100206	40.3712	60.1884	20.5541	0.341496	-1.55006	1.34583e-07
ENSG00000137843	110.121	148.44	71.8014	0.483708	-1.04779	1.39433e-07
ENSG00000204149	102.954	139.389	66.5199	0.477225	-1.06726	1.52655e-07
ENSG00000018625	45.8111	67.3105	24.3117	0.361188	-1.46918	1.57671e-07
ENSG00000175318	71.2089	99.8069	42.6109	0.426933	-1.22792	1.60455e-07
ENSG00000099365	122.129	163.227	81.0317	0.496435	-1.01032	1.81325e-07
ENSG00000081059	77.5073	107.995	47.0195	0.435386	-1.19963	1.85175e-07
ENSG00000165028	61.8579	87.8238	35.8921	0.408682	-1.29095	2.15032e-07
ENSG00000213462	51.0814	75.0287	27.1342	0.361651	-1.46733	2.28013e-07
ENSG00000160678	28.0861	43.8169	12.3553	0.281975	-1.82636	2.32399e-07
ENSG00000130675	103.438	139.598	67.2771	0.481933	-1.0531	2.53844e-07
ENSG00000143375	82.7844	114.499	51.0698	0.446028	-1.1648	2.60562e-07
ENSG00000188338	60.6215	86.1001	35.1428	0.408163	-1.29278	2.67693e-07
ENSG00000160271	86.9452	119.64	54.25	0.453442	-1.14101	2.74353e-07
ENSG00000156574	8.07419	15.4264	0.721955	0.0467999	-4.41735	2.77859e-07
ENSG00000115041	95.2589	129.069	61.4489	0.476094	-1.07068	3.33468e-07
ENSG00000178440	24.89	44.0461	5.73398	0.130181	-2.94141	3.41143e-07
ENSG00000188542	70.5658	98.4021	42.7295	0.434233	-1.20346	3.76354e-07
ENSG00000285043	57.4441	81.7691	33.1191	0.405032	-1.30389	3.81538e-07
ENSG00000174807	13.2282	23.1103	3.34622	0.144794	-2.78793	4.01359e-07
ENSG00000170092	41.0564	60.7744	21.3384	0.351108	-1.51001	4.3583e-07
ENSG00000249471	73.1644	101.152	45.1764	0.446617	-1.16289	4.43565e-07
ENSG00000164532	31.1426	49.8231	12.4621	0.250127	-1.99927	4.48089e-07
ENSG00000132639	86.2259	117.394	55.0581	0.469005	-1.09233	4.57536e-07
ENSG00000172296	111.848	149.344	74.3528	0.497862	-1.00618	4.60516e-07
ENSG00000260007	47.8587	69.6125	26.1048	0.375001	-1.41503	5.07025e-07
ENSG00000135722	99.1464	133.047	65.2455	0.490394	-1.02799	5.76865e-07
ENSG00000144596	38.187	56.6633	19.7107	0.347857	-1.52344	5.85226e-07
ENSG00000159958	67.3972	93.7515	41.0428	0.437783	-1.19171	5.88127e-07
ENSG00000277758	256.834	349.624	164.043	0.469198	-1.09173	6.03885e-07
ENSG00000172382	67.0133	92.8831	41.1435	0.44296	-1.17475	6.15645e-07
ENSG00000165959	91.7774	123.502	60.0524	0.486245	-1.04024	7.33812e-07
ENSG00000250312	59.6163	83.8937	35.3388	0.421233	-1.24731	8.4925e-07
ENSG00000164707	60.8047	84.9245	36.685	0.431972	-1.21099	9.60852e-07
ENSG00000163888	67.4438	94.0551	40.8325	0.434134	-1.20379	9.61665e-07
ENSG00000131781	43.4099	64.7867	22.0331	0.340086	-1.55603	9.65948e-07
ENSG00000183091	69.2424	95.6248	42.86	0.44821	-1.15775	1.0001e-06
ENSG00000170379	66.2088	92.043	40.3745	0.438649	-1.18886	1.33824e-06
ENSG00000198865	11.0931	19.6389	2.54735	0.129709	-2.94665	1.47562e-06
ENSG00000205238	50.687	71.923	29.451	0.409479	-1.28814	1.47609e-06
ENSG00000179627	103.752	139.822	67.6825	0.484062	-1.04674	1.59549e-06
ENSG00000167614	42.9007	65.7977	20.0037	0.304019	-1.71777	1.82406e-06
ENSG00000164061	52.3668	73.7116	31.0221	0.420858	-1.24859	1.97661e-06
ENSG00000255423	30.3347	45.7957	14.8738	0.324786	-1.62244	2.11096e-06
ENSG00000228253	255.168	341.849	168.486	0.492867	-1.02073	2.28802e-06
ENSG00000160408	40.5793	58.9006	22.258	0.377892	-1.40396	2.37466e-06
ENSG00000163406	60.1985	83.2119	37.185	0.446871	-1.16207	2.47024e-06
ENSG00000088538	64.395	88.8322	39.9578	0.449812	-1.15261	2.62695e-06
ENSG00000164008	88.1881	118.187	58.1887	0.492342	-1.02227	2.66241e-06
ENSG00000170703	48.0661	68.0015	28.1308	0.413679	-1.27342	3.06968e-06
ENSG00000177576	27.8376	42.0799	13.5952	0.323081	-1.63003	3.51047e-06
ENSG00000146859	200.835	272.489	129.181	0.474078	-1.0768	3.67152e-06
ENSG00000180616	19.7298	31.3852	8.0745	0.257271	-1.95864	3.74016e-06
ENSG00000115594	81.7183	112.322	51.1148	0.455074	-1.13583	4.35922e-06
ENSG00000007314	14.246	23.7313	4.76065	0.200606	-2.31756	5.36408e-06
ENSG00000197837	82.1436	112.599	51.6887	0.459053	-1.12327	5.382e-06
ENSG00000185670	74.1813	100.219	48.1433	0.480381	-1.05775	5.44007e-06
ENSG00000139908	114.957	159.413	70.5005	0.442251	-1.17706	5.44898e-06
ENSG00000181143	196.994	267.251	126.737	0.474224	-1.07636	5.47683e-06
ENSG00000136630	65.2859	88.7445	41.8273	0.471323	-1.08521	5.67674e-06
ENSG00000171368	47.2283	66.4582	27.9984	0.421294	-1.2471	6.0531e-06
ENSG00000183615	64.7028	87.9841	41.4214	0.470783	-1.08687	6.33351e-06
ENSG00000186832	46.9269	66.9865	26.8673	0.401085	-1.31802	6.99799e-06
ENSG00000135441	32.2688	47.2441	17.2935	0.366045	-1.44991	7.28206e-06
ENSG00000163803	46.6839	65.4346	27.9333	0.426888	-1.22807	7.60077e-06
ENSG00000108839	75.2903	100.872	49.709	0.492794	-1.02094	7.75667e-06
ENSG00000285437	50.1572	69.6715	30.6429	0.439819	-1.18502	8.11931e-06
ENSG00000066405	19.5094	30.6045	8.41432	0.274938	-1.86282	8.37515e-06
ENSG00000181029	25.4476	38.4394	12.4559	0.32404	-1.62576	9.09266e-06
ENSG00000162804	43.1194	60.8474	25.3915	0.417297	-1.26085	9.13875e-06
ENSG00000166669	67.0502	90.8323	43.2681	0.476352	-1.0699	1.02473e-05
ENSG00000178665	72.0751	96.9303	47.2199	0.487154	-1.03755	1.05034e-05
ENSG00000132692	63.7623	91.4244	36.1002	0.394864	-1.34057	1.22598e-05
ENSG00000026036	54.658	75.0302	34.2857	0.456958	-1.12987	1.24882e-05
ENSG00000162426	39.1053	55.6387	22.5719	0.405687	-1.30156	1.26654e-05
ENSG00000166046	71.7989	95.8326	47.7652	0.498423	-1.00456	1.44817e-05
ENSG00000111837	42.1516	63.2846	21.0187	0.33213	-1.59018	1.58893e-05
ENSG00000063438	50.5856	69.6167	31.5546	0.453261	-1.14159	1.63137e-05
ENSG00000149609	17.588	27.9448	7.23108	0.258763	-1.9503	1.68367e-05
ENSG00000167371	34.133	49.1615	19.1044	0.388606	-1.36362	1.70091e-05
ENSG00000008323	59.1422	80.0225	38.2619	0.478139	-1.0645	2.27402e-05
ENSG00000188095	15.9289	25.2365	6.62129	0.262369	-1.93033	2.86103e-05
ENSG00000184486	29.0244	42.264	15.7848	0.373481	-1.42089	2.8685e-05
ENSG00000174500	50.313	68.9855	31.6406	0.458656	-1.12452	2.98428e-05
ENSG00000075886	22.2268	33.5566	10.8969	0.324733	-1.62267	3.38908e-05
ENSG00000176894	27.0529	39.5552	14.5506	0.367855	-1.44279	3.4328e-05
ENSG00000151006	50.5952	69.1625	32.0278	0.463081	-1.11066	3.6998e-05
ENSG00000099834	15.2695	24.2281	6.31095	0.26048	-1.94075	3.86234e-05
ENSG00000188322	15.2466	24.3037	6.18949	0.254673	-1.97328	3.89082e-05
ENSG00000143512	31.6323	45.4002	17.8645	0.393489	-1.34561	4.24916e-05
ENSG00000183186	16.514	26.0634	6.96464	0.267219	-1.9039	4.28882e-05
ENSG00000095539	38.2662	53.6969	22.8355	0.425266	-1.23356	4.48662e-05
ENSG00000284862	15.5819	24.7021	6.4617	0.261584	-1.93465	4.49254e-05
ENSG00000214827	56.788	76.1897	37.3863	0.4907	-1.02709	4.56539e-05
ENSG00000172292	237.528	330.049	145.007	0.439351	-1.18655	5.14e-05
ENSG00000105711	57.8644	77.3339	38.3949	0.496481	-1.01019	5.50486e-05
ENSG00000183977	27.5883	39.83	15.3466	0.385302	-1.37594	5.7859e-05
ENSG00000169184	35.6698	50.2677	21.0719	0.419194	-1.25431	5.88179e-05
ENSG00000158859	34.4626	48.3919	20.5333	0.424312	-1.2368	6.89562e-05
ENSG00000167094	35.3426	49.5514	21.1338	0.426502	-1.22937	6.96024e-05
ENSG00000163959	41.4913	57.0881	25.8944	0.453587	-1.14055	7.36418e-05
ENSG00000154330	27.27	39.4269	15.1132	0.383321	-1.38337	8.29581e-05
ENSG00000247595	26.8666	39.4635	14.2698	0.361594	-1.46756	9.35663e-05
ENSG00000177614	15.3783	24.1734	6.58316	0.272331	-1.87657	9.45535e-05
ENSG00000225526	39.5599	54.8468	24.273	0.44256	-1.17606	9.51143e-05
ENSG00000114757	24.9531	36.5503	13.3558	0.36541	-1.45241	9.70898e-05
ENSG00000086570	13.4126	21.4195	5.40569	0.252373	-1.98637	0.000100838
ENSG00000163354	39.0501	53.7741	24.3262	0.452377	-1.1444	0.000101782
ENSG00000283930	11.8609	19.3312	4.39069	0.22713	-2.13841	0.000105573
ENSG00000150637	32.1639	45.4569	18.8708	0.415136	-1.26834	0.000105785
ENSG00000076344	34.4356	48.042	20.8292	0.433562	-1.20569	0.000106253
ENSG00000197768	4.62834	8.88384	0.372836	0.0419678	-4.57457	0.000108328
ENSG00000163701	48.6522	65.4194	31.8851	0.487395	-1.03684	0.000109961
ENSG00000188931	189.95	255.491	124.408	0.486938	-1.03819	0.000122123
ENSG00000284130	7.45799	13.0964	1.81963	0.138942	-2.84745	0.000126847
ENSG00000179044	12.7013	20.3431	5.05945	0.248705	-2.00749	0.000139889
ENSG00000170689	49.4079	65.9983	32.8174	0.497246	-1.00797	0.000151977
ENSG00000144893	33.5305	46.8268	20.2343	0.432109	-1.21053	0.000162253
ENSG00000070731	6.63813	11.8086	1.46763	0.124284	-3.00828	0.000164876
ENSG00000004838	36.7533	50.5152	22.9915	0.455141	-1.13561	0.0001742
ENSG00000187017	30.2576	42.5737	17.9414	0.421419	-1.24667	0.000187934
ENSG00000189144	50.8168	67.9041	33.7295	0.496723	-1.00949	0.000211571
ENSG00000258311	34.1439	47.2101	21.0777	0.446466	-1.16338	0.000211727
ENSG00000184986	17.7144	26.6977	8.73107	0.327035	-1.61248	0.000211839
ENSG00000196859	10.1649	16.7142	3.61554	0.216316	-2.20879	0.000221275
ENSG00000186897	39.7726	54.2454	25.2997	0.466393	-1.10038	0.000221295
ENSG00000171431	21.5602	31.4663	11.6541	0.370368	-1.43297	0.000221453
ENSG00000261408	10.151	17.3524	2.94967	0.169986	-2.55651	0.000226993
ENSG00000136206	39.8903	54.3504	25.4303	0.467895	-1.09574	0.00025377
ENSG00000170482	34.4331	47.9802	20.8859	0.435303	-1.19991	0.000253799
ENSG00000267426	8.35884	14.2264	2.49127	0.175116	-2.51362	0.00027184
ENSG00000167895	19.6944	29.229	10.1599	0.347597	-1.52451	0.000272607
ENSG00000132938	42.101	56.5943	27.6077	0.487816	-1.03559	0.0002765
ENSG00000130377	12.0621	19.0884	5.03574	0.263811	-1.92242	0.000293474
ENSG00000154485	23.3278	35.1165	11.5391	0.328595	-1.60562	0.000294288
ENSG00000169031	128.783	173.358	84.2077	0.485743	-1.04173	0.000312149
ENSG00000102908	2210.88	3005.91	1415.84	0.471019	-1.08614	0.000327328
ENSG00000239382	37.5424	50.9684	24.1165	0.473165	-1.07958	0.000353275
ENSG00000165521	34.0554	46.6717	21.439	0.459357	-1.12231	0.000357493
ENSG00000174945	16.8477	25.3846	8.31081	0.327396	-1.61089	0.000358241
ENSG00000166793	17.3468	26.0776	8.61603	0.3304	-1.59771	0.000367581
ENSG00000132321	11.5554	18.3294	4.78148	0.260864	-1.93863	0.000385409
ENSG00000140749	6.18416	10.8712	1.49711	0.137713	-2.86026	0.000404437
ENSG00000140057	16.7176	25.781	7.65423	0.296894	-1.75198	0.000407998
ENSG00000176490	25.4957	35.9998	14.9917	0.416439	-1.26382	0.000424298
ENSG00000242028	12.527	19.4737	5.58035	0.286559	-1.8031	0.000451718
ENSG00000154269	15.1907	23.1001	7.2814	0.315211	-1.66561	0.000465726
ENSG00000183682	42.2347	56.3703	28.0991	0.498473	-1.00441	0.000469507
ENSG00000181322	19.0668	28.027	10.1067	0.360607	-1.4715	0.000484274
ENSG00000197714	31.4605	43.4052	19.5159	0.44962	-1.15322	0.000496005
ENSG00000267710	17.2426	25.7095	8.77562	0.341338	-1.55073	0.00051208
ENSG00000136457	16.7257	25.3948	8.05655	0.317253	-1.6563	0.000519022
ENSG00000102760	41.1889	55.0308	27.347	0.496939	-1.00886	0.000546283
ENSG00000183876	18.5282	27.1803	9.87618	0.363358	-1.46054	0.000560002
ENSG00000158008	16.4787	24.5754	8.38195	0.34107	-1.55186	0.000621814
ENSG00000140009	26.9132	37.2074	16.6189	0.446657	-1.16276	0.000650105
ENSG00000166482	13.1034	20.041	6.16577	0.307658	-1.7006	0.00067166
ENSG00000074276	13.7094	20.8623	6.55656	0.314278	-1.66989	0.000678948
ENSG00000125531	17.7569	26.0578	9.45591	0.362882	-1.46243	0.000680895
ENSG00000198569	39.8716	53.3842	26.359	0.493761	-1.01811	0.000695273
ENSG00000134709	18.4913	28.1982	8.78427	0.311518	-1.68261	0.000709428
ENSG00000254536	15.312	22.9906	7.6334	0.332023	-1.59064	0.000723964
ENSG00000164776	34.7306	46.9511	22.5101	0.479437	-1.06059	0.000729382
ENSG00000153093	12.2571	18.9251	5.589	0.295322	-1.75964	0.000820034
ENSG00000154760	25.7	36.7014	14.6987	0.400493	-1.32015	0.000848337
ENSG00000095370	12.6802	19.4934	5.86697	0.300971	-1.7323	0.000879461
ENSG00000119227	41.811	59.0796	24.5423	0.41541	-1.26739	0.00089252
ENSG00000171217	8.29662	13.6996	2.89359	0.211216	-2.24321	0.000899288
ENSG00000137857	25.0542	34.7942	15.3142	0.440138	-1.18397	0.000921679
ENSG00000168970	32.274	44.2448	20.3032	0.458884	-1.1238	0.00100498
ENSG00000171097	15.9849	24.0081	7.96169	0.331625	-1.59238	0.00110899
ENSG00000172738	15.9013	23.2755	8.52713	0.366356	-1.44868	0.00111977
ENSG00000182327	12.3772	18.9997	5.75481	0.30289	-1.72313	0.00112944
ENSG00000188269	12.3771	18.8901	5.86409	0.310431	-1.68766	0.00112947
ENSG00000182264	3.6304	6.91168	0.34912	0.0505116	-4.30724	0.00121898
ENSG00000131730	26.7626	41.7138	11.8113	0.283151	-1.82036	0.0013187
ENSG00000172789	7.39839	12.276	2.52075	0.205339	-2.28392	0.00135354
ENSG00000019102	12.7298	19.35	6.10969	0.315747	-1.66316	0.00143262
ENSG00000109163	10.7296	16.7755	4.68373	0.279201	-1.84062	0.00144241
ENSG00000188833	10.0279	15.686	4.36986	0.278583	-1.84382	0.00144575
ENSG00000103150	49.3942	68.0704	30.718	0.451268	-1.14794	0.0014961
ENSG00000109625	13.7391	20.4187	7.05951	0.345738	-1.53225	0.00149831
ENSG00000140323	20.663	29.2781	12.0478	0.411495	-1.28105	0.00151819
ENSG00000186118	2.64061	5.28123	0	0	-Inf	0.0015286
ENSG00000124091	13.5991	20.3695	6.82877	0.335244	-1.57672	0.00154942
ENSG00000139445	14.131	20.9303	7.33171	0.350293	-1.51337	0.00156242
ENSG00000265590	15.7072	22.9678	8.44668	0.367762	-1.44315	0.00157986
ENSG00000137561	11.0299	16.9322	5.12772	0.302839	-1.72338	0.00160586
ENSG00000157343	30.1618	40.5626	19.761	0.487173	-1.03749	0.00164331
ENSG00000178502	210.539	282.456	138.622	0.490776	-1.02686	0.00164396
ENSG00000138615	30.7853	43.0346	18.5361	0.430726	-1.21516	0.00180189
ENSG00000179284	16.2401	23.6542	8.82594	0.373124	-1.42227	0.0018285
ENSG00000166546	19.8282	27.8987	11.7577	0.421441	-1.2466	0.00186265
ENSG00000234465	18.8221	26.6941	10.9501	0.410208	-1.28557	0.00191104
ENSG00000100053	14.4628	21.239	7.6866	0.361909	-1.4663	0.00191524
ENSG00000151967	23.8682	32.7505	14.9859	0.457579	-1.12791	0.00193813
ENSG00000288721	6.14725	10.4246	1.86994	0.179379	-2.47892	0.00197332
ENSG00000147255	8.74267	13.8224	3.66297	0.265004	-1.91592	0.00197777
ENSG00000204316	31.0049	41.4974	20.5124	0.494306	-1.01652	0.00198366
ENSG00000155066	11.2608	17.0483	5.4733	0.321047	-1.63914	0.0021255
ENSG00000134072	29.0473	39.0994	18.9952	0.485817	-1.04151	0.00219864
ENSG00000167080	18.3535	26.1268	10.5802	0.404956	-1.30416	0.00220699
ENSG00000186714	7.06742	11.617	2.51787	0.21674	-2.20596	0.00228897
ENSG00000105695	17.6939	25.056	10.3317	0.412343	-1.27808	0.00229614
ENSG00000142959	9.30443	14.5615	4.04734	0.277947	-1.84712	0.00248821
ENSG00000268279	35.2444	49.991	20.4978	0.410031	-1.2862	0.00263218
ENSG00000100505	6.86323	11.5282	2.19823	0.190682	-2.39076	0.00270934
ENSG00000166819	27.7307	39.653	15.8085	0.398672	-1.32673	0.00271884
ENSG00000233436	8.09213	12.9387	3.24559	0.250844	-1.99514	0.00278053
ENSG00000029534	21.6165	29.8181	13.4148	0.449888	-1.15236	0.00281911
ENSG00000162924	234.948	318.721	151.174	0.474315	-1.07608	0.00284954
ENSG00000213928	28.6736	38.3197	19.0275	0.496547	-1.01	0.00287752
ENSG00000145217	21.0161	29.3127	12.7195	0.433923	-1.20449	0.00290707
ENSG00000272442	2.44897	4.89794	0	0	-Inf	0.00300947
ENSG00000162645	25.4566	34.4007	16.5125	0.480006	-1.05888	0.00301272
ENSG00000087494	11.7343	17.5958	5.87273	0.333757	-1.58313	0.00305018
ENSG00000135835	18.4337	26.0208	10.8466	0.416844	-1.26242	0.00308
ENSG00000260097	26.5379	35.6079	17.4679	0.490563	-1.02749	0.00328159
ENSG00000171060	13.0446	19.1274	6.96176	0.363969	-1.45811	0.00329863
ENSG00000176920	13.9973	20.3583	7.63628	0.375094	-1.41468	0.00334162
ENSG00000188783	3.17867	6.00823	0.34912	0.058107	-4.10515	0.00346442
ENSG00000171722	5.80547	10.889	0.721955	0.0663014	-3.91482	0.00349222
ENSG00000188211	2051.65	2796.64	1306.66	0.467224	-1.09781	0.00353044
ENSG00000173678	13.1486	19.3678	6.9294	0.35778	-1.48285	0.00361057
ENSG00000111087	26.1984	35.3427	17.0541	0.482534	-1.0513	0.00371763
ENSG00000187372	18.0097	25.0778	10.9415	0.436301	-1.1966	0.00378556
ENSG00000197140	12.7985	19.1913	6.40562	0.333777	-1.58304	0.00385586
ENSG00000242950	7.45967	12.0286	2.8907	0.240319	-2.05698	0.00389959
ENSG00000213397	12.3262	18.1935	6.45881	0.355006	-1.49408	0.00403108
ENSG00000100429	6.18859	10.2055	2.17163	0.212789	-2.2325	0.0042374
ENSG00000162931	21.6228	29.5585	13.687	0.463048	-1.11077	0.00429422
ENSG00000157017	7.80756	12.3516	3.26354	0.264221	-1.92018	0.00443304
ENSG00000184451	16.6638	23.419	9.90854	0.423098	-1.24093	0.00446491
ENSG00000176009	2.25683	4.51366	0	0	-Inf	0.00460008
ENSG00000066230	19.8181	27.1681	12.4681	0.458923	-1.12367	0.0046323
ENSG00000187024	14.3265	20.7208	7.93221	0.382813	-1.38529	0.00463702
ENSG00000170667	14.3265	20.5282	8.12482	0.395788	-1.3372	0.00463703
ENSG00000161896	8.51922	14.1981	2.84039	0.200055	-2.32153	0.0046881
ENSG00000168878	3.08855	5.80139	0.375718	0.0647634	-3.94868	0.00469536
ENSG00000161405	11.5463	18.7522	4.34038	0.231459	-2.11117	0.00469696
ENSG00000070808	5.54296	9.26053	1.82539	0.197115	-2.34289	0.00478909
ENSG00000246922	49.6701	67.3714	31.9689	0.474517	-1.07547	0.00482078
ENSG00000132000	17.8944	24.6905	11.0982	0.449492	-1.15363	0.00503609
ENSG00000115705	6.17279	10.097	2.24854	0.222694	-2.16687	0.00520794
ENSG00000188263	16.8183	23.4408	10.1958	0.43496	-1.20104	0.00532749
ENSG00000047662	16.4145	23.0535	9.77555	0.424038	-1.23774	0.0053495
ENSG00000078795	16.9216	24.0497	9.7935	0.407219	-1.29612	0.00547427
ENSG00000214402	5.25225	9.0577	1.44679	0.159731	-2.64629	0.00553598
ENSG00000142677	12.2066	17.8214	6.59181	0.369881	-1.43487	0.00565133
ENSG00000205693	11.1219	16.3826	5.8612	0.357769	-1.4829	0.00573904
ENSG00000258643	14.4016	20.4744	8.32876	0.406788	-1.29765	0.00575122
ENSG00000168517	13.9422	19.8042	8.08027	0.408008	-1.29333	0.00578613
ENSG00000075073	4.05526	7.38569	0.724838	0.0981408	-3.349	0.0059046
ENSG00000146267	29.7145	41.0644	18.3645	0.447213	-1.16097	0.00597244
ENSG00000018280	16.8883	23.5513	10.2253	0.434171	-1.20366	0.00602817
ENSG00000160097	7.21702	11.8953	2.5387	0.21342	-2.22823	0.00644352
ENSG00000159871	12.9523	18.555	7.34966	0.396101	-1.33606	0.00685105
ENSG00000172940	7.54223	11.836	3.24847	0.274457	-1.86535	0.00697183
ENSG00000253457	3.64216	6.56236	0.721955	0.110015	-3.18423	0.00705313
ENSG00000055813	8.13756	12.6121	3.66297	0.290432	-1.78373	0.00710075
ENSG00000176428	5.80666	9.44458	2.16875	0.229629	-2.12262	0.00731603
ENSG00000100027	7.9196	12.2948	3.54439	0.288284	-1.79444	0.00756906
ENSG00000056558	26.8118	37.6054	16.0182	0.425955	-1.23123	0.00758304
ENSG00000138483	18.6722	25.3146	12.0299	0.475214	-1.07335	0.00765983
ENSG00000254995	6.42383	10.2471	2.60055	0.253783	-1.97833	0.00767345
ENSG00000187105	14.283	20.1099	8.45598	0.420488	-1.24986	0.00782303
ENSG00000261052	8.38822	12.7349	4.04157	0.317363	-1.65579	0.00788875
ENSG00000139899	12.472	18.1124	6.83165	0.377181	-1.40667	0.00801543
ENSG00000141837	10.7786	16.5185	5.03862	0.305029	-1.71298	0.00803541
ENSG00000079385	20.7942	28.8984	12.69	0.439123	-1.1873	0.00809451
ENSG00000121211	6.25646	9.97134	2.54158	0.254889	-1.97206	0.00814386
ENSG00000137804	19.6631	26.6865	12.6397	0.473635	-1.07815	0.00817065
ENSG00000167701	28.6982	38.2863	19.1102	0.49914	-1.00248	0.00827375
ENSG00000153822	20.6853	27.8581	13.5126	0.485049	-1.0438	0.00863346
ENSG00000100985	18.6859	25.3836	11.9882	0.472281	-1.08228	0.00866574
ENSG00000100351	7.87052	12.0428	3.69822	0.307089	-1.70327	0.00916927
ENSG00000244476	4.59566	7.72081	1.47051	0.19046	-2.39244	0.0092687
ENSG00000119725	23.3477	31.624	15.0715	0.476585	-1.0692	0.00937551
ENSG00000175463	16.2067	22.913	9.50046	0.414632	-1.2701	0.0093988
ENSG00000125510	1.99345	3.9869	0	0	-Inf	0.00968483
ENSG00000110693	9.82333	14.5843	5.06234	0.347108	-1.52654	0.00990046
ENSG00000148204	11.5953	16.7821	6.4085	0.381865	-1.38886	0.0101774
ENSG00000049283	3.36935	5.99303	0.745671	0.124423	-3.00667	0.0103535
ENSG00000112139	18.2078	24.655	11.7605	0.477005	-1.06793	0.0114628
ENSG00000149488	5.58387	8.97816	2.18958	0.243879	-2.03576	0.0118281
ENSG00000183578	9.23303	13.6996	4.76641	0.347922	-1.52316	0.0118761
ENSG00000175093	10.1086	14.7496	5.46753	0.370691	-1.43171	0.0121911
ENSG00000160111	19.4058	26.036	12.7755	0.490687	-1.02713	0.0121957
ENSG00000165923	10.0306	14.6173	5.44382	0.372423	-1.42499	0.0124036
ENSG00000120729	16.0474	23.7185	8.37619	0.353149	-1.50165	0.0124744
ENSG00000037280	16.6484	22.5419	10.7548	0.477104	-1.06762	0.0127366
ENSG00000182759	25.4775	34.8276	16.1275	0.463067	-1.11071	0.0129911
ENSG00000204538	3.89993	6.67847	1.12139	0.167911	-2.57423	0.0130281
ENSG00000137880	6.61382	10.3075	2.92018	0.283308	-1.81956	0.0131735
ENSG00000185352	5.02938	8.23338	1.82539	0.221707	-2.17328	0.0133421
ENSG00000185339	19.7419	26.4655	13.0183	0.491896	-1.02357	0.0135507
ENSG00000172508	9.40288	14.0272	4.7786	0.340667	-1.55356	0.0138206
ENSG00000168000	26.4381	35.4852	17.391	0.490091	-1.02888	0.0138779
ENSG00000203772	12.315	17.3013	7.32883	0.423601	-1.23922	0.0139338
ENSG00000159713	2.54799	4.74687	0.34912	0.0735474	-3.76518	0.0139733
ENSG00000073598	3.23956	5.73345	0.745671	0.130056	-2.94279	0.0139838
ENSG00000273706	11.0581	15.9476	6.16866	0.386808	-1.37031	0.0140891
ENSG00000204956	18.8767	25.3176	12.4357	0.491188	-1.02565	0.0143177
ENSG00000215018	8.58918	12.8114	4.36698	0.340867	-1.55272	0.0144564
ENSG00000241489	2.13034	4.26068	0	0	-Inf	0.014724
ENSG00000157890	9.42575	13.8158	5.03574	0.364492	-1.45604	0.0149824
ENSG00000239605	14.5393	20.0278	9.05071	0.451907	-1.1459	0.0167767
ENSG00000174236	2.24034	4.48068	0	0	-Inf	0.0170028
ENSG00000106006	10.431	14.995	5.86697	0.391262	-1.35379	0.0171122
ENSG00000182782	6.35765	9.76851	2.94678	0.301661	-1.729	0.017116
ENSG00000135074	6.89986	10.5067	3.29302	0.313421	-1.67383	0.0173761
ENSG00000162068	8.66656	12.9245	4.40865	0.341108	-1.5517	0.0175669
ENSG00000120693	17.6552	23.6116	11.6987	0.495463	-1.01315	0.017902
ENSG00000010327	9.33349	13.5486	5.11841	0.377782	-1.40437	0.017934
ENSG00000176029	7.85513	11.6773	4.03293	0.345364	-1.53381	0.0180386
ENSG00000187987	8.16848	13.544	2.79296	0.206214	-2.27779	0.018129
ENSG00000180878	7.83094	11.7001	3.96178	0.33861	-1.5623	0.0181488
ENSG00000165269	7.77384	11.583	3.96466	0.342283	-1.54674	0.0184132
ENSG00000262152	7.72703	11.4923	3.96178	0.344734	-1.53644	0.0186345
ENSG00000226174	10.4334	15.1121	5.75481	0.380809	-1.39286	0.0189397
ENSG00000064195	11.5995	16.2401	6.95888	0.428498	-1.22264	0.0198257
ENSG00000137411	11.5663	16.2477	6.88485	0.423742	-1.23874	0.0199434
ENSG00000127364	16.163	21.7632	10.5629	0.485356	-1.04288	0.0199886
ENSG00000122367	14.2562	19.3905	9.12186	0.470428	-1.08795	0.0200039
ENSG00000154274	1.73007	3.46013	0	0	-Inf	0.0204526
ENSG00000214860	11.0552	15.5775	6.53284	0.419377	-1.25368	0.0205045
ENSG00000105664	6.36305	9.85623	2.86987	0.291173	-1.78005	0.0205073
ENSG00000087237	11.0544	15.5435	6.56521	0.422376	-1.2434	0.0205075
ENSG00000172650	15.6957	21.2136	10.1779	0.47978	-1.05956	0.0206458
ENSG00000183486	13.7508	18.7203	8.78139	0.469084	-1.09208	0.0207147
ENSG00000088827	10.9141	15.245	6.58316	0.431825	-1.21148	0.021049
ENSG00000134571	8.72419	12.6791	4.76929	0.376154	-1.4106	0.0217858
ENSG00000241360	9.58108	13.7478	5.41434	0.393833	-1.34435	0.0217983
ENSG00000249853	7.22131	10.7739	3.66874	0.340522	-1.55418	0.0220149
ENSG00000168060	4.72691	7.6047	1.84911	0.243153	-2.04006	0.0223558
ENSG00000168124	3.62325	6.1517	1.09479	0.177966	-2.49033	0.0229201
ENSG00000166589	13.8304	18.8384	8.8224	0.46832	-1.09443	0.0233915
ENSG00000157782	3.54012	5.98544	1.09479	0.182909	-2.4508	0.023803
ENSG00000258986	2.37773	4.75546	0	0	-Inf	0.0249088
ENSG00000100156	5.70952	8.85087	2.56818	0.290162	-1.78507	0.0250286
ENSG00000205704	5.59899	8.65063	2.54735	0.29447	-1.76381	0.0258861
ENSG00000228049	16.0416	22.2164	9.86687	0.444126	-1.17096	0.025925
ENSG00000184923	5.56715	8.64304	2.49127	0.28824	-1.79466	0.0261422
ENSG00000186204	12.5583	17.1578	7.9588	0.463859	-1.10824	0.0261606
ENSG00000213937	5.56122	8.5751	2.54735	0.297064	-1.75116	0.0261904
ENSG00000107105	11.9335	16.633	7.23397	0.434916	-1.20119	0.0263586
ENSG00000163050	7.16664	10.6466	3.68669	0.346279	-1.52999	0.0265018
ENSG00000105672	11.8061	16.3724	7.23973	0.44219	-1.17726	0.0269094
ENSG00000084734	7.57309	11.0335	4.11272	0.37275	-1.42372	0.0270273
ENSG00000123407	2.85672	4.96489	0.748554	0.15077	-2.72958	0.0270713
ENSG00000170476	2.85614	5.01405	0.698239	0.139257	-2.84418	0.0270798
ENSG00000206199	2.85482	4.98767	0.721955	0.144748	-2.78839	0.0270993
ENSG00000155428	4.0225	6.59533	1.44968	0.219803	-2.18572	0.027121
ENSG00000059915	6.52162	9.7797	3.26354	0.333706	-1.58335	0.027409
ENSG00000049540	2.24684	4.14457	0.34912	0.0842355	-3.56943	0.0274871
ENSG00000108244	2.82788	4.93092	0.724838	0.146999	-2.76613	0.0275003
ENSG00000085514	13.577	18.4201	8.73396	0.474153	-1.07658	0.0277185
ENSG00000007402	10.9796	15.4472	6.51201	0.421566	-1.24617	0.027835
ENSG00000120457	1.66392	3.32784	0	0	-Inf	0.0284759
ENSG00000178403	10.8218	14.9864	6.65719	0.444216	-1.17067	0.028599
ENSG00000188039	4.5704	7.37149	1.76931	0.240021	-2.05877	0.0288624
ENSG00000112812	10.0522	14.2964	5.80801	0.406257	-1.29953	0.0298372
ENSG00000284308	5.31268	8.39765	2.22771	0.265278	-1.91442	0.0302365
ENSG00000187556	9.39898	13.3154	5.4826	0.41175	-1.28016	0.0306936
ENSG00000107317	1.53793	3.07585	0	0	-Inf	0.0312827
ENSG00000159640	4.95037	7.73199	2.16875	0.28049	-1.83398	0.0316155
ENSG00000183971	5.53863	8.48536	2.5919	0.305455	-1.71097	0.0317146
ENSG00000145103	3.34238	5.58997	1.09479	0.195849	-2.35219	0.0322554
ENSG00000089505	22.5532	30.7657	14.3407	0.466126	-1.10121	0.032461
ENSG00000181444	6.53184	9.72035	3.34333	0.343952	-1.53972	0.0325389
ENSG00000105642	8.33122	11.9521	4.71033	0.394101	-1.34336	0.0325876
ENSG00000169314	6.51785	9.79588	3.23982	0.330733	-1.59626	0.0326542
ENSG00000132437	5.99165	9.06889	2.91442	0.321365	-1.63772	0.0326827
ENSG00000284906	5.42924	8.23998	2.6185	0.31778	-1.6539	0.0327572
ENSG00000183598	5.96938	9.06889	2.86987	0.316452	-1.65994	0.0328823
ENSG00000203685	1.46619	2.93237	0	0	-Inf	0.0332925
ENSG00000118156	5.91889	8.94419	2.89359	0.323516	-1.62809	0.0333424
ENSG00000161270	12.9468	17.5203	8.37331	0.477921	-1.06516	0.0334859
ENSG00000225805	2.84392	4.96588	0.721955	0.145383	-2.78207	0.0341567
ENSG00000175946	2.80615	4.89035	0.721955	0.147629	-2.75995	0.0348083
ENSG00000188396	3.85362	6.23384	1.47339	0.236354	-2.08098	0.0355709
ENSG00000187554	2.7514	4.78084	0.721955	0.15101	-2.72728	0.0357945
ENSG00000174885	3.83652	6.22624	1.44679	0.23237	-2.1055	0.0358095
ENSG00000213930	9.33154	13.1805	5.4826	0.415964	-1.26547	0.0361796
ENSG00000179902	2.66032	4.5958	0.724838	0.157717	-2.66459	0.0375527
ENSG00000110900	8.40068	12.0702	4.73117	0.391971	-1.35118	0.0376183
ENSG00000181652	4.37371	6.90408	1.84334	0.266994	-1.90512	0.0376504
ENSG00000105808	8.65122	12.2193	5.08317	0.415996	-1.26536	0.0384966
ENSG00000205560	4.90884	7.67264	2.14503	0.279569	-1.83872	0.0387221
ENSG00000163884	8.25002	11.7868	4.71322	0.399871	-1.32239	0.0387581
ENSG00000174225	8.15617	11.5754	4.73693	0.409224	-1.28904	0.039498
ENSG00000197093	10.5198	14.5276	6.51201	0.448252	-1.15762	0.0400455
ENSG00000183813	8.06083	11.4056	4.7161	0.413491	-1.27407	0.0402744
ENSG00000182183	6.83578	9.96115	3.71041	0.372488	-1.42474	0.0402802
ENSG00000145777	7.24598	10.3972	4.09477	0.393834	-1.34434	0.0404924
ENSG00000172575	10.3645	14.2406	6.48829	0.455619	-1.1341	0.0410786
ENSG00000215912	3.27684	5.4323	1.12139	0.20643	-2.27628	0.0410799
ENSG00000186451	5.76249	8.54872	2.97626	0.348153	-1.52221	0.0415144
ENSG00000230358	9.98903	13.7174	6.26064	0.4564	-1.13163	0.0417289
ENSG00000255154	5.22075	7.92364	2.51787	0.317767	-1.65396	0.0417739
ENSG00000236383	15.1064	21.0585	9.15422	0.434704	-1.2019	0.0419384
ENSG00000205795	9.95311	13.7138	6.19237	0.451542	-1.14707	0.0419826
ENSG00000126353	3.18934	5.3076	1.07108	0.2018	-2.309	0.0426627
ENSG00000168348	3.83995	6.18567	1.49423	0.241562	-2.04953	0.0438845
ENSG00000143858	11.1461	15.0346	7.25768	0.482733	-1.0507	0.0451069
ENSG00000167910	1.40434	2.80867	0	0	-Inf	0.0455826
ENSG00000239857	10.4902	14.4266	6.55368	0.454276	-1.13836	0.0463375
ENSG00000184524	12.2795	16.5499	8.00912	0.483938	-1.04711	0.0464918
ENSG00000104901	4.96514	7.75577	2.17451	0.280374	-1.83458	0.0465441
ENSG00000159496	3.6666	5.88353	1.44968	0.246396	-2.02095	0.0467896
ENSG00000133477	7.21302	10.4793	3.94671	0.376619	-1.40882	0.0469664
ENSG00000125409	1.36657	2.73314	0	0	-Inf	0.0470455
ENSG00000124257	12.1619	16.2817	8.04214	0.493937	-1.0176	0.0472494
ENSG00000163632	8.36876	11.7255	5.01202	0.427447	-1.22618	0.0472719
ENSG00000204889	7.16737	10.3226	4.01209	0.388669	-1.36339	0.048458
ENSG00000259305	1.30802	2.61603	0	0	-Inf	0.0495133
ENSG00000239388	11.6326	15.5699	7.69524	0.494238	-1.01672	0.0495259
ENSG00000036530	2.54607	4.37018	0.721955	0.1652	-2.59771	0.0496876
